# Supplementary material for: Cembrene Diterpenoids with Ether Linkages from Sarcophyton ehrenbergi: An Anti-Proliferation and Molecular-Docking Assessment
Source: MDPI journal article supplement (doi:10.3390/md15060192), 2017-06-21
Supplement: s1 [file s1]

## Supplementary Information

**Table S1.** Conformer relative free energies with respect to the most stable form.

**Table S2.** Calculated binding energies ( $\Delta G$ ) for the most and least active compounds.

**Figure S1.** HR-ESI-FTMS spectrum of Sarcoehrenbergilid A (**1**).

**Figure S2.**  $^1\text{H}$  NMR spectrum of Sarcoehrenbergilid A (**1**) in  $\text{CDCl}_3$ .

**Figure S3.**  $^{13}\text{C}$  NMR spectrum of Sarcoehrenbergilid A (**1**) in  $\text{CDCl}_3$ .

**Figure S4.** DEPT spectrum of Sarcoehrenbergilid A (**1**) in  $\text{CDCl}_3$ .

**Figure S5.** HSQC spectrum of Sarcoehrenbergilid A (**1**) in  $\text{CDCl}_3$ .

**Figure S6.** HMBC spectrum of Sarcoehrenbergilid A (**1**) in  $\text{CDCl}_3$ .

**Figure S7.** NOESY spectrum of Sarcoehrenbergilid A (**1**) in  $\text{CDCl}_3$ .

**Figure S8.** HR-ESI-FTMS spectrum of Sarcoehrenbergilid B (**2**).

**Figure S9.**  $^1\text{H}$  NMR spectrum of Sarcoehrenbergilid B (**2**) in  $\text{CDCl}_3$ .

**Figure S10.**  $^{13}\text{C}$  NMR spectrum of Sarcoehrenbergilid B (**2**) in  $\text{CDCl}_3$ .

**Figure S11.**  $^1\text{H}$ - $^1\text{H}$  COSY spectrum of Sarcoehrenbergilid B (**2**) in  $\text{CDCl}_3$ .

**Figure S12.** HSQC spectrum of Sarcoehrenbergilid B (**2**) in  $\text{CDCl}_3$ .

**Figure S13.** HMBC spectrum of Sarcoehrenbergilid B (**2**) in  $\text{CDCl}_3$ .

**Figure S14.** NOESY spectrum of Sarcoehrenbergilid B (**2**) in  $\text{CDCl}_3$ .

**Figure S15.** HR-ESI-FTMS spectrum of Sarcoehrenbergilid C (**3**).

**Figure S16.**  $^1\text{H}$  NMR spectrum of Sarcoehrenbergilid C (**3**) in  $\text{CDCl}_3$ .

**Figure S17.**  $^{13}\text{C}$  NMR spectrum of Sarcoehrenbergilid C (**3**) in  $\text{CDCl}_3$ .

**Figure S18.** DEPT spectrum of Sarcoehrenbergilid C (**3**) in  $\text{CDCl}_3$ .

**Figure S19.** HSQC spectrum of Sarcoehrenbergilid C (**3**) in  $\text{CDCl}_3$ .

**Figure S20.** HMBC spectrum of Sarcoehrenbergilid C (**3**) in  $\text{CDCl}_3$ .

**Figure S21.** NOESY spectrum of Sarcoehrenbergilid C (**3**) in  $\text{CDCl}_3$ .

**Figure S22.** Optimized structure and relative free energy of conformers of **1** with Boltzmann population higher than 1%.

**Figure S23.** Optimized structure and relative free energy of conformers of **2** with Boltzmann population higher than 1%.

**Figure S24.** Optimized structure and relative free energy of conformers of **3** with Boltzmann population higher than 1%.

**Figure S25.** Anti-proliferative A549 response curves with **1-8** based on MTT-reduction assay.

**Figure S26.** Anti-proliferative Caco-2 response curves with **1-8** based on MTT-reduction assay.

**Figure S27.** Anti-proliferative HepG2 response curves with **1-8** based on MTT-reduction assay.

**Figure S28.** Calculated (i) Autodock and (ii) MM/GBSA binding energies of compounds with EGFR kinase domain relative to the experimental binding energies for the tested compounds against A549 cell line.

**Figure S29.** Hydrogen bond distance between **8** and carboxylate oxygen atom of Asp<sup>776</sup> inside EGFR active site.

**Table S1.** Conformer relative free energies with respect to the most stable form.

| Compound | Conformer ID | Relative Free Energy<br>$\Delta G$ (kJ/mol) | Boltzmann Factor <sup>a</sup> $e^{(-\Delta G/RT)}$ | Population % | Optical Rotation (degree) <sup>b</sup> |
|----------|--------------|---------------------------------------------|----------------------------------------------------|--------------|----------------------------------------|
| 1        | 1a           | 0.00                                        | 1.00                                               | 37.44        | -244.3                                 |
|          | 1b           | +2.8                                        | 0.32                                               | 11.89        | -204.1                                 |
|          | 1c           | +3.1                                        | 0.29                                               | 10.74        | -16.5                                  |
|          | 1d           | +3.2                                        | 0.27                                               | 10.26        | 67.0                                   |
|          | 1e           | +4.2                                        | 0.18                                               | 6.75         | 33.2                                   |
|          | 1f           | +4.3                                        | 0.17                                               | 6.50         | -127.6                                 |
|          | 1g           | +5.3                                        | 0.12                                               | 4.48         | 192.7                                  |
|          | 1h           | +7.0                                        | 0.06                                               | 2.18         | 88.2                                   |
|          | 1i           | +7.4                                        | 0.05                                               | 1.87         | -85.7                                  |
|          |              |                                             |                                                    |              |                                        |
| 2        | 2a           | 0.00                                        | 1.00                                               | 34.21        | -88.5                                  |
|          | 2b           | +0.2                                        | 0.94                                               | 32.03        | -89.5                                  |
|          | 2c           | +1.5                                        | 0.54                                               | 18.48        | 68.8                                   |
|          | 2d           | +4.4                                        | 0.17                                               | 5.82         | 223.6                                  |
|          | 2e           | +6.6                                        | 0.07                                               | 2.37         | -37.8                                  |
|          | 2f           | +6.8                                        | 0.07                                               | 2.24         | 37.5                                   |
|          | 2g           | +7.4                                        | 0.05                                               | 1.70         | 38.4                                   |
|          |              |                                             |                                                    |              | -32.6 <sup>c</sup>                     |
| 3        | 3a           | 0.00                                        | 1.00                                               | 37.62        | -162.84                                |
|          | 3b           | +0.9                                        | 0.69                                               | 25.82        | 65.13                                  |
|          | 3c           | +4.0                                        | 0.20                                               | 7.41         | -10.52                                 |
|          | 3d           | +5.5                                        | 0.11                                               | 4.11         | -119.51                                |
|          | 3e           | +5.9                                        | 0.09                                               | 3.47         | -10.25                                 |
|          | 3f           | +6.0                                        | 0.09                                               | 3.34         | -13.39                                 |
|          | 3g           | +6.0                                        | 0.09                                               | 3.33         | 132.21                                 |
|          | 3h           | +6.7                                        | 0.07                                               | 2.52         | -96.37                                 |
|          | 3i           | +6.9                                        | 0.06                                               | 2.35         | -40.38                                 |
|          | 3j           | +8.6                                        | 0.03                                               | 1.16         | 8.17                                   |
|          |              |                                             |                                                    |              | -49.8 <sup>c</sup>                     |

<sup>a</sup>Calculated at 298K.<sup>b</sup>Calculated at B3LYP/6-31G\* level of theory with the polarizable continuum model (PCM) for chloroform.<sup>c</sup>Boltzmann-weighted mean optical rotation.

**Table S2.** Calculated auto-dock and MM/GBSA binding energies ( $\Delta G$ ) for the most and least active compounds complexed with the EGFR kinase domain.

| Compound                                  | IC <sub>50</sub> ( $\mu$ M) <sup>a</sup> | $\Delta G_{\text{exp}}$ (kcal/mol) <sup>b</sup> | $\Delta G_{\text{calc}}$ (kcal/mol) |                   | Binding Features   |        |                         |
|-------------------------------------------|------------------------------------------|-------------------------------------------------|-------------------------------------|-------------------|--------------------|--------|-------------------------|
|                                           |                                          |                                                 | AutoDock                            | MM/GBSA           | Residue            | Type   | Length ( $\text{\AA}$ ) |
| Erlotinib                                 | nd                                       | ---                                             | -7.23                               | -47.89            | Met <sub>769</sub> | H-bond | 2.01                    |
|                                           |                                          |                                                 |                                     |                   | Cys <sub>773</sub> | H-bond | 2.05                    |
| Afatinib                                  | nd                                       | ---                                             | -7.68                               | -55.90            | Met <sub>769</sub> | H-bond | 2.09                    |
|                                           |                                          |                                                 |                                     |                   | Leu <sub>694</sub> | H-bond | 2.10                    |
|                                           |                                          |                                                 |                                     |                   | Cys <sub>773</sub> | H-bond | 1.90                    |
|                                           |                                          |                                                 |                                     |                   | Lys <sub>692</sub> | H-bond | 1.91                    |
| Gefitinib                                 | nd                                       | ---                                             | -7.69                               | -50.23            | Thr <sub>766</sub> | H-bond | 2.08                    |
|                                           |                                          |                                                 |                                     |                   | Met <sub>769</sub> | H-bond | 2.24                    |
| Doxorubicin                               | 0.62                                     | -8.46                                           | -8.94                               | -54.72            | Lys <sub>721</sub> | H-bond | 1.92                    |
|                                           |                                          |                                                 |                                     |                   | Thr <sub>766</sub> | H-bond | 1.76                    |
|                                           |                                          |                                                 |                                     |                   | Met <sub>769</sub> | H-bond | 1.82                    |
|                                           |                                          |                                                 |                                     |                   | Thr <sub>830</sub> | H-bond | 1.92                    |
|                                           |                                          |                                                 |                                     |                   | Asp <sub>831</sub> | H-bond | 1.94                    |
| 8                                         | 27.3                                     | -6.22                                           | -8.13                               | -41.18            | Thr <sub>766</sub> | H-bond | 1.79                    |
|                                           |                                          |                                                 |                                     |                   | Asp <sub>776</sub> | H-bond | 1.62                    |
| 7                                         | 43.6                                     | -5.94                                           | -5.82                               | -36.52            | Thr <sub>766</sub> | H-bond | 1.75                    |
|                                           |                                          |                                                 |                                     |                   | Thr <sub>830</sub> | H-bond | 1.87                    |
| 6                                         | 37.0                                     | -6.04                                           | -6.14                               | -38.04            | Met <sub>769</sub> | H-bond | 1.82                    |
|                                           |                                          |                                                 |                                     |                   | Asp <sub>831</sub> | H-bond | 1.65                    |
| 4                                         | 91.5                                     | -5.51                                           | -7.17                               | -31.81            | Lys <sub>721</sub> | H-bond | 1.82                    |
| Correlation coefficient (R <sup>2</sup> ) |                                          |                                                 | 0.37 <sup>c</sup>                   | 0.96 <sup>c</sup> |                    |        |                         |

<sup>a</sup>IC<sub>50</sub> Values for the tested compounds against A549 cell line.

<sup>b</sup>Calculated based on the experimental IC<sub>50</sub>.

<sup>c</sup>Erlotinib, afatinib and gefitinib were not considered in the calculated correlation due to the absence of the corresponding experimental IC<sub>50</sub>.

**Figure S1.** HR-ESI-FTMS spectrum of Sarcoehrenbergilid A (1) in CDCl<sub>3</sub>.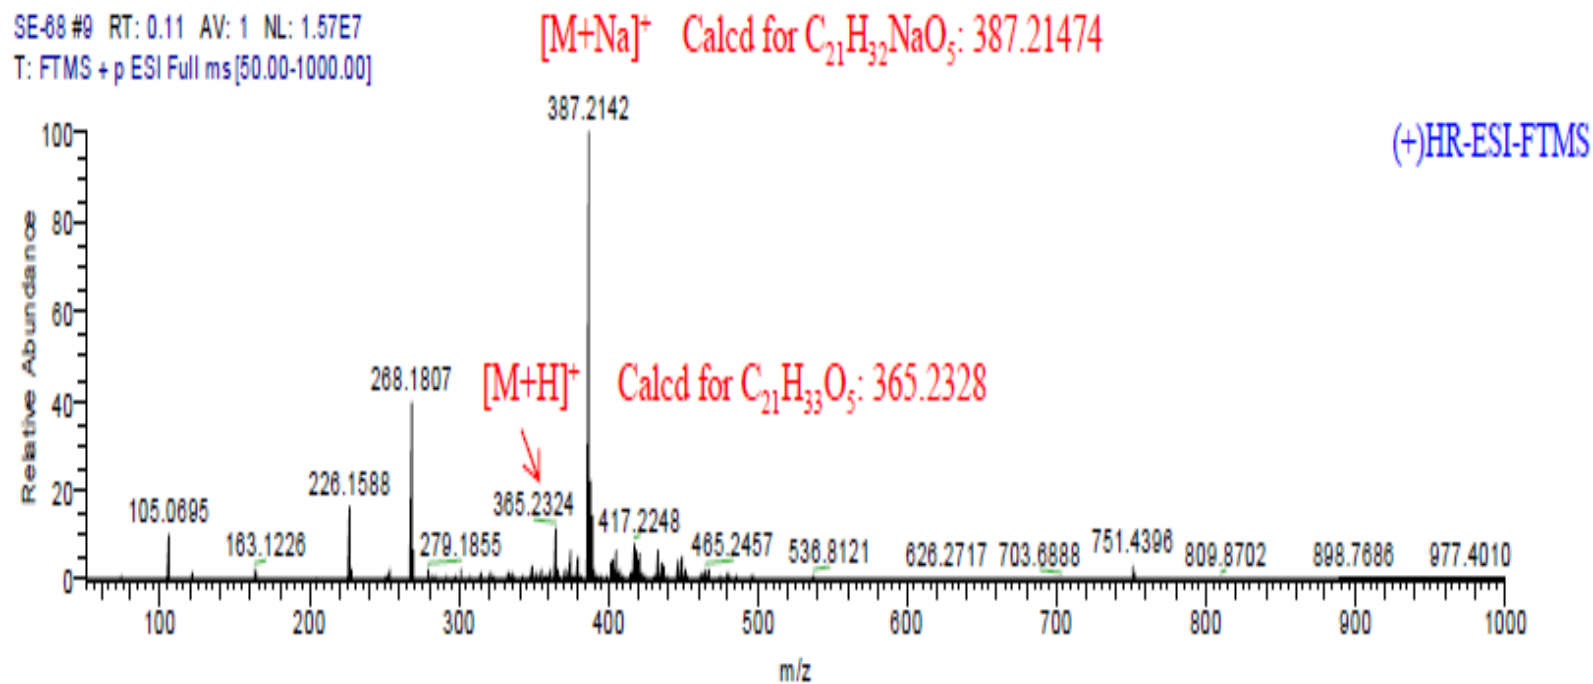

**Figure S2.**  $^1\text{H}$  NMR spectrum of Sarcoehrenbergilid A (**1**) in  $\text{CDCl}_3$ .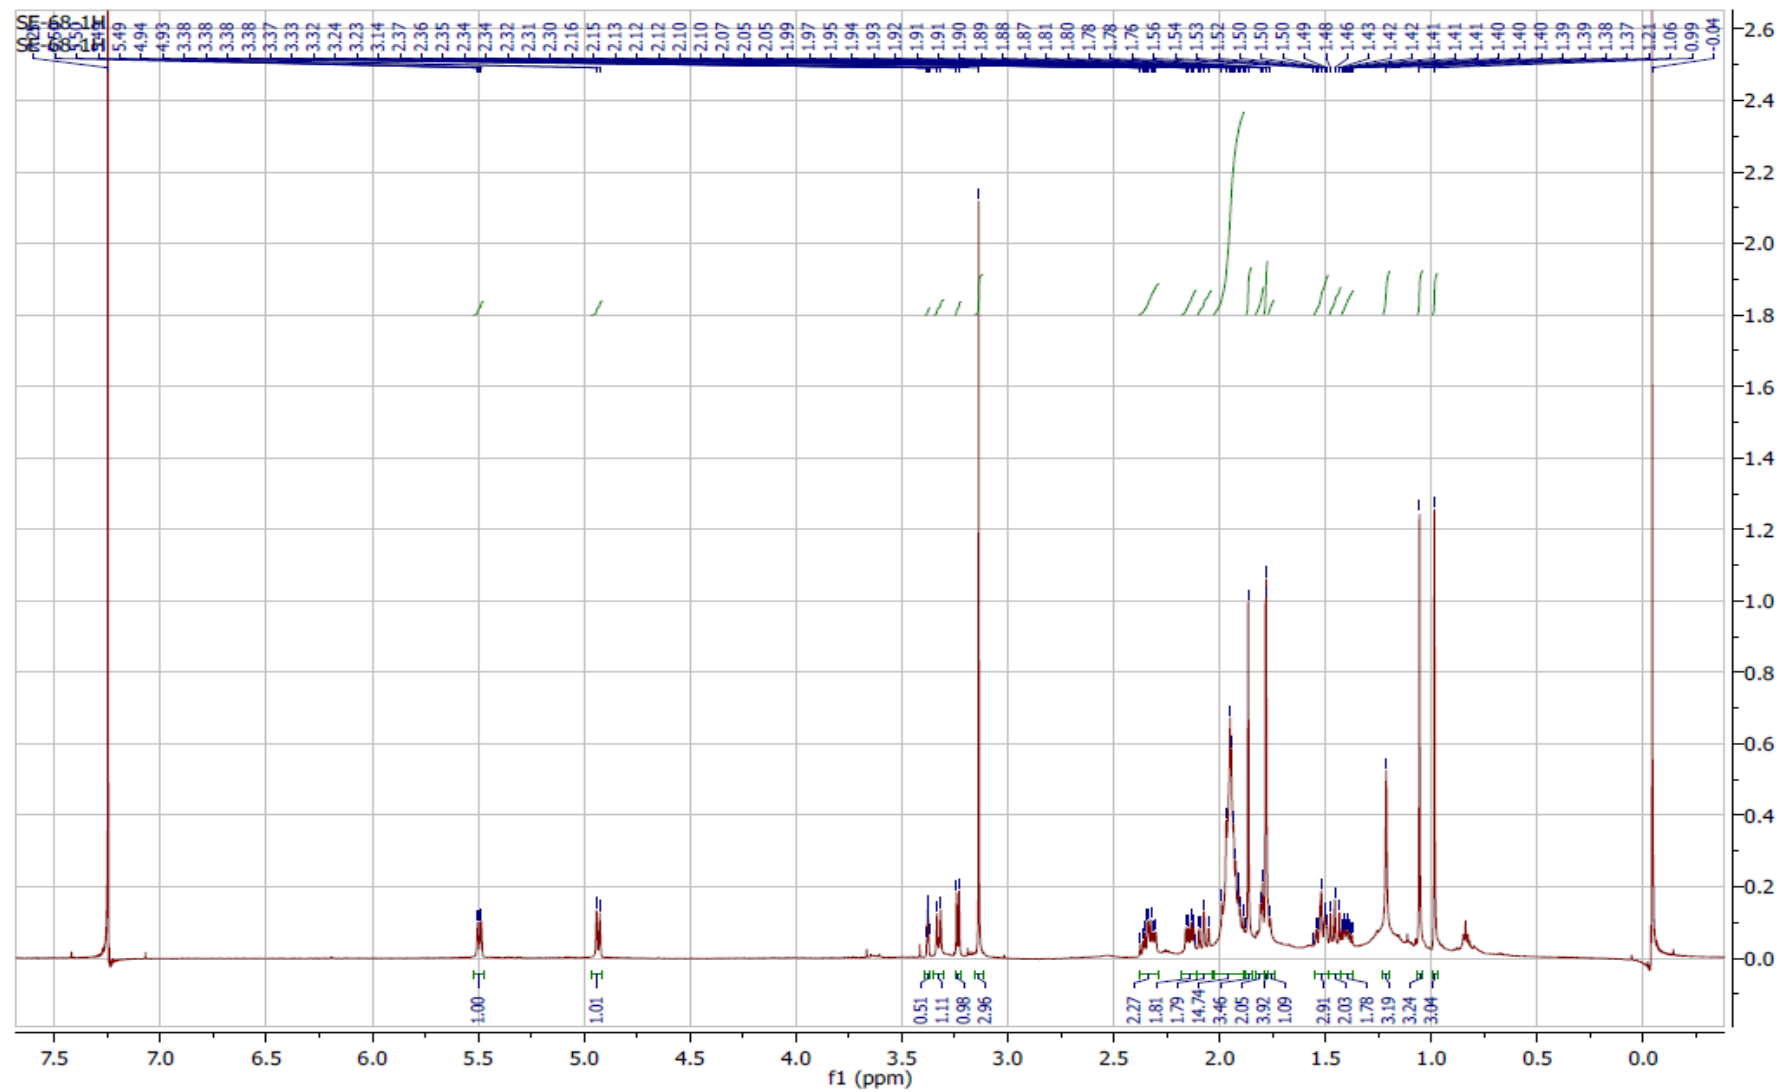

**Figure S3.**  $^{13}\text{C}$  NMR spectrum of Sarcoehrenbergilid A (**1**) in  $\text{CDCl}_3$ .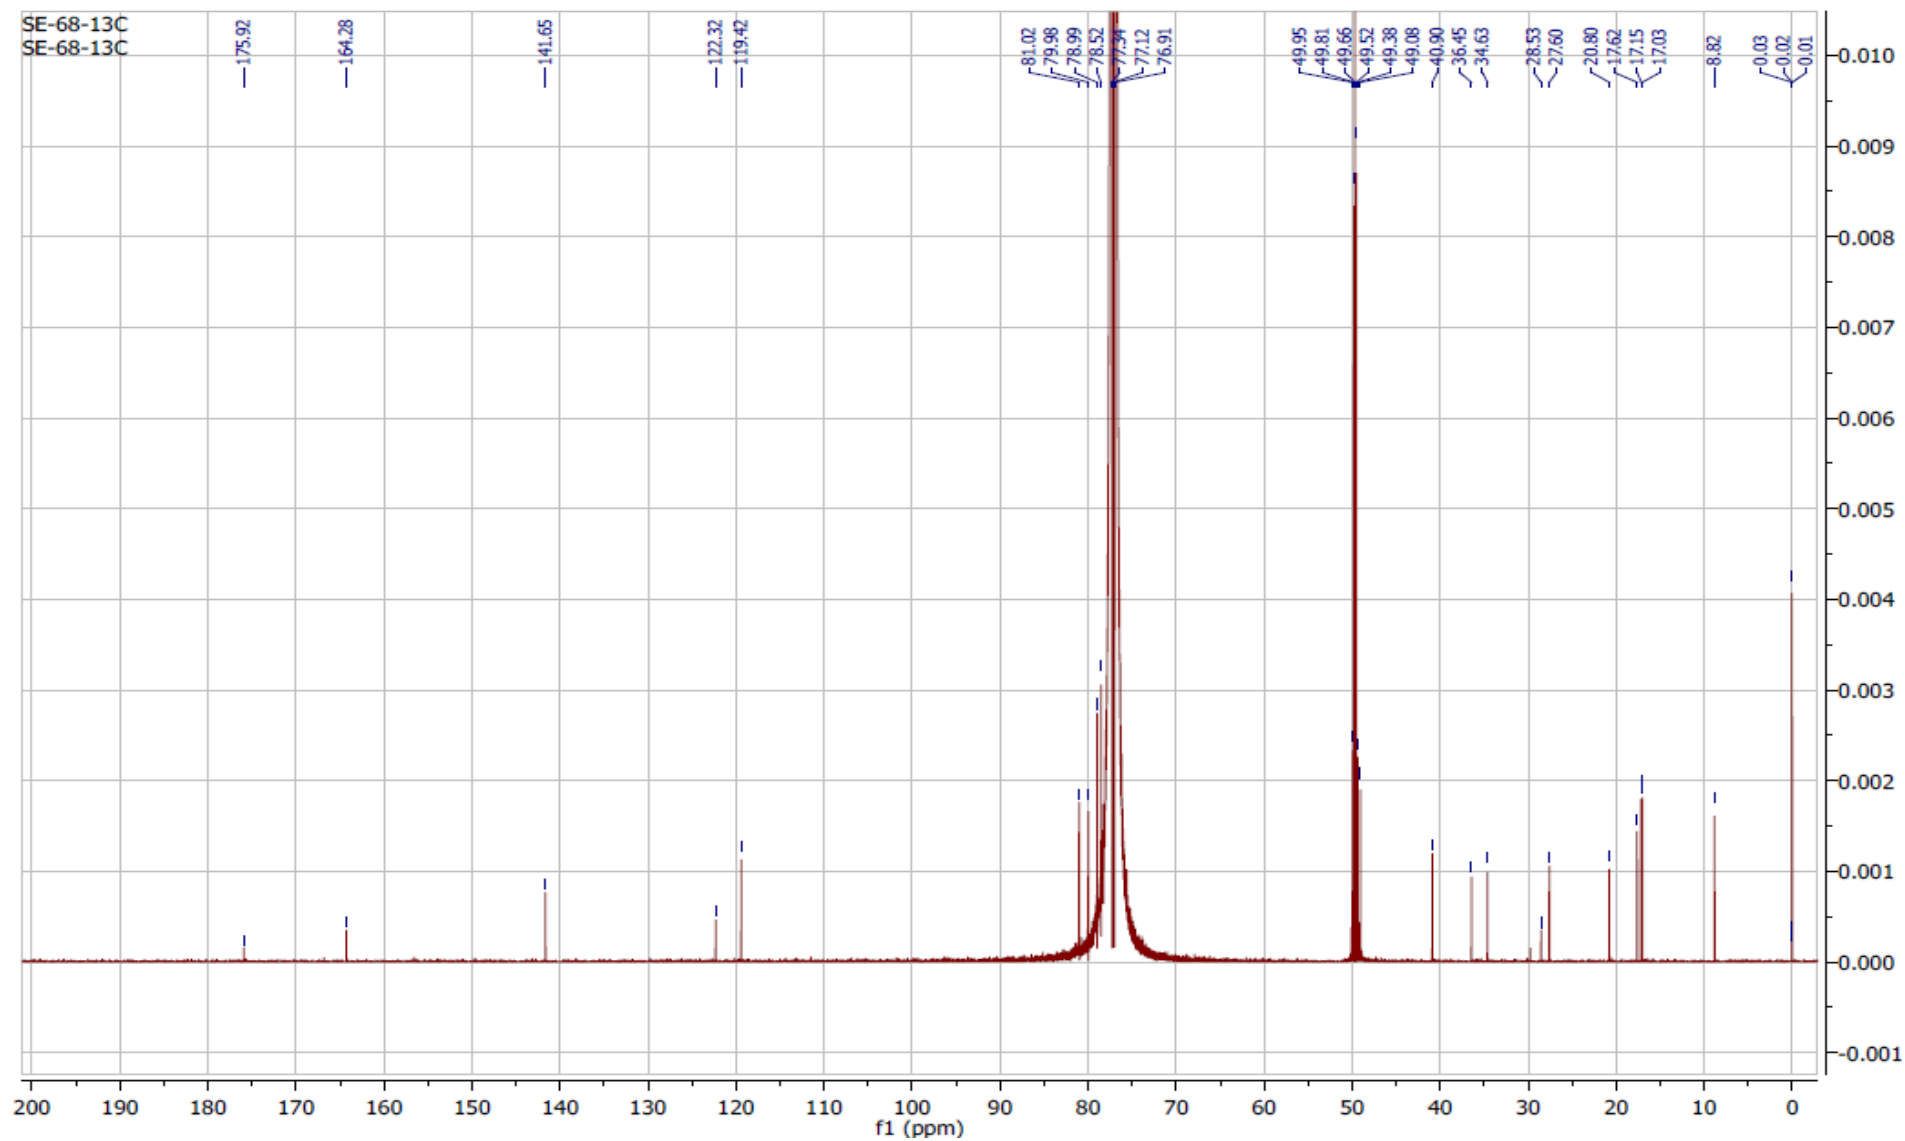

Figure S4. DEPT spectrum of Sarcoehrenbergilid A (1) in CDCl<sub>3</sub>.

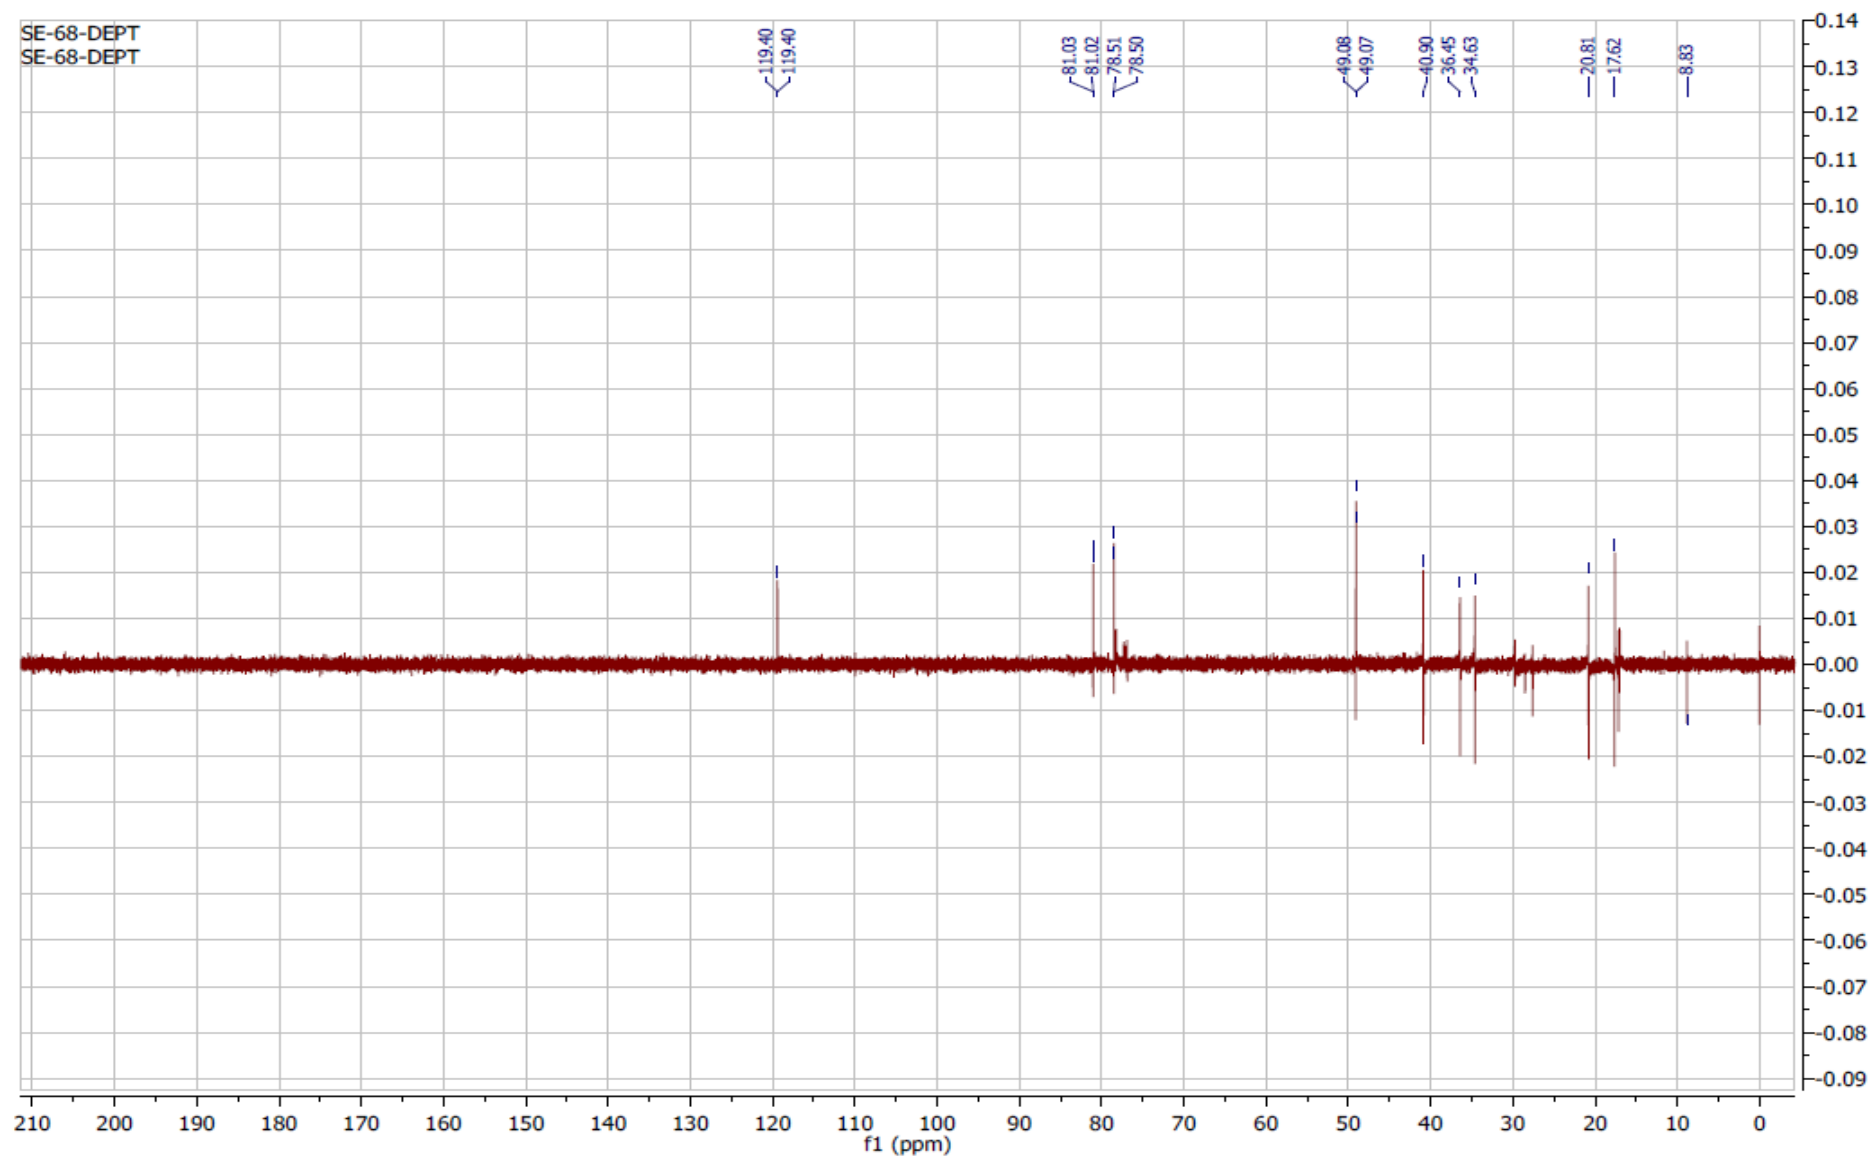



Figure S5. HMBC spectrum of Sarcoehrenbergilid A (1) in CHCl<sub>3</sub>.

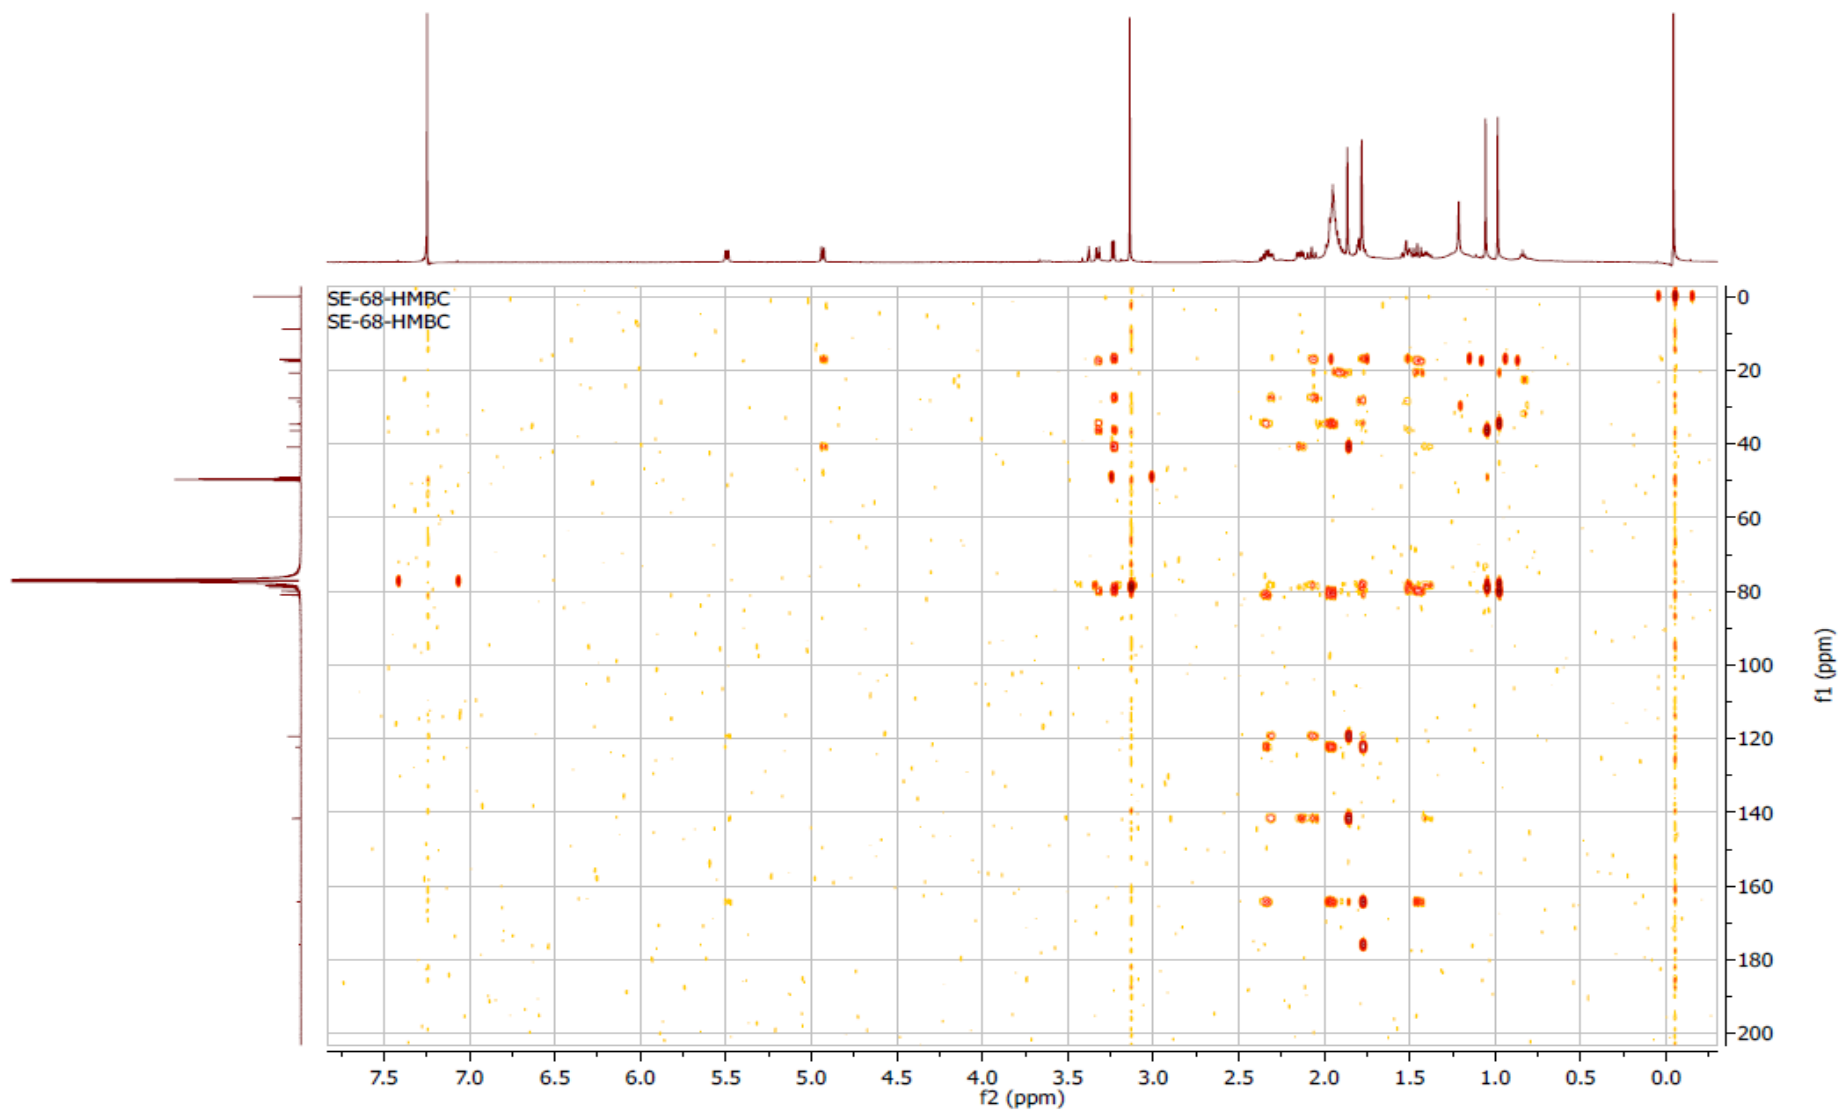

Figure

Fig. S6.  $^1\text{H}$ ,  $^1\text{H}$  COSY spectrum of Sarcoehrenbergilid A (1) in  $\text{CDCl}_3$ .

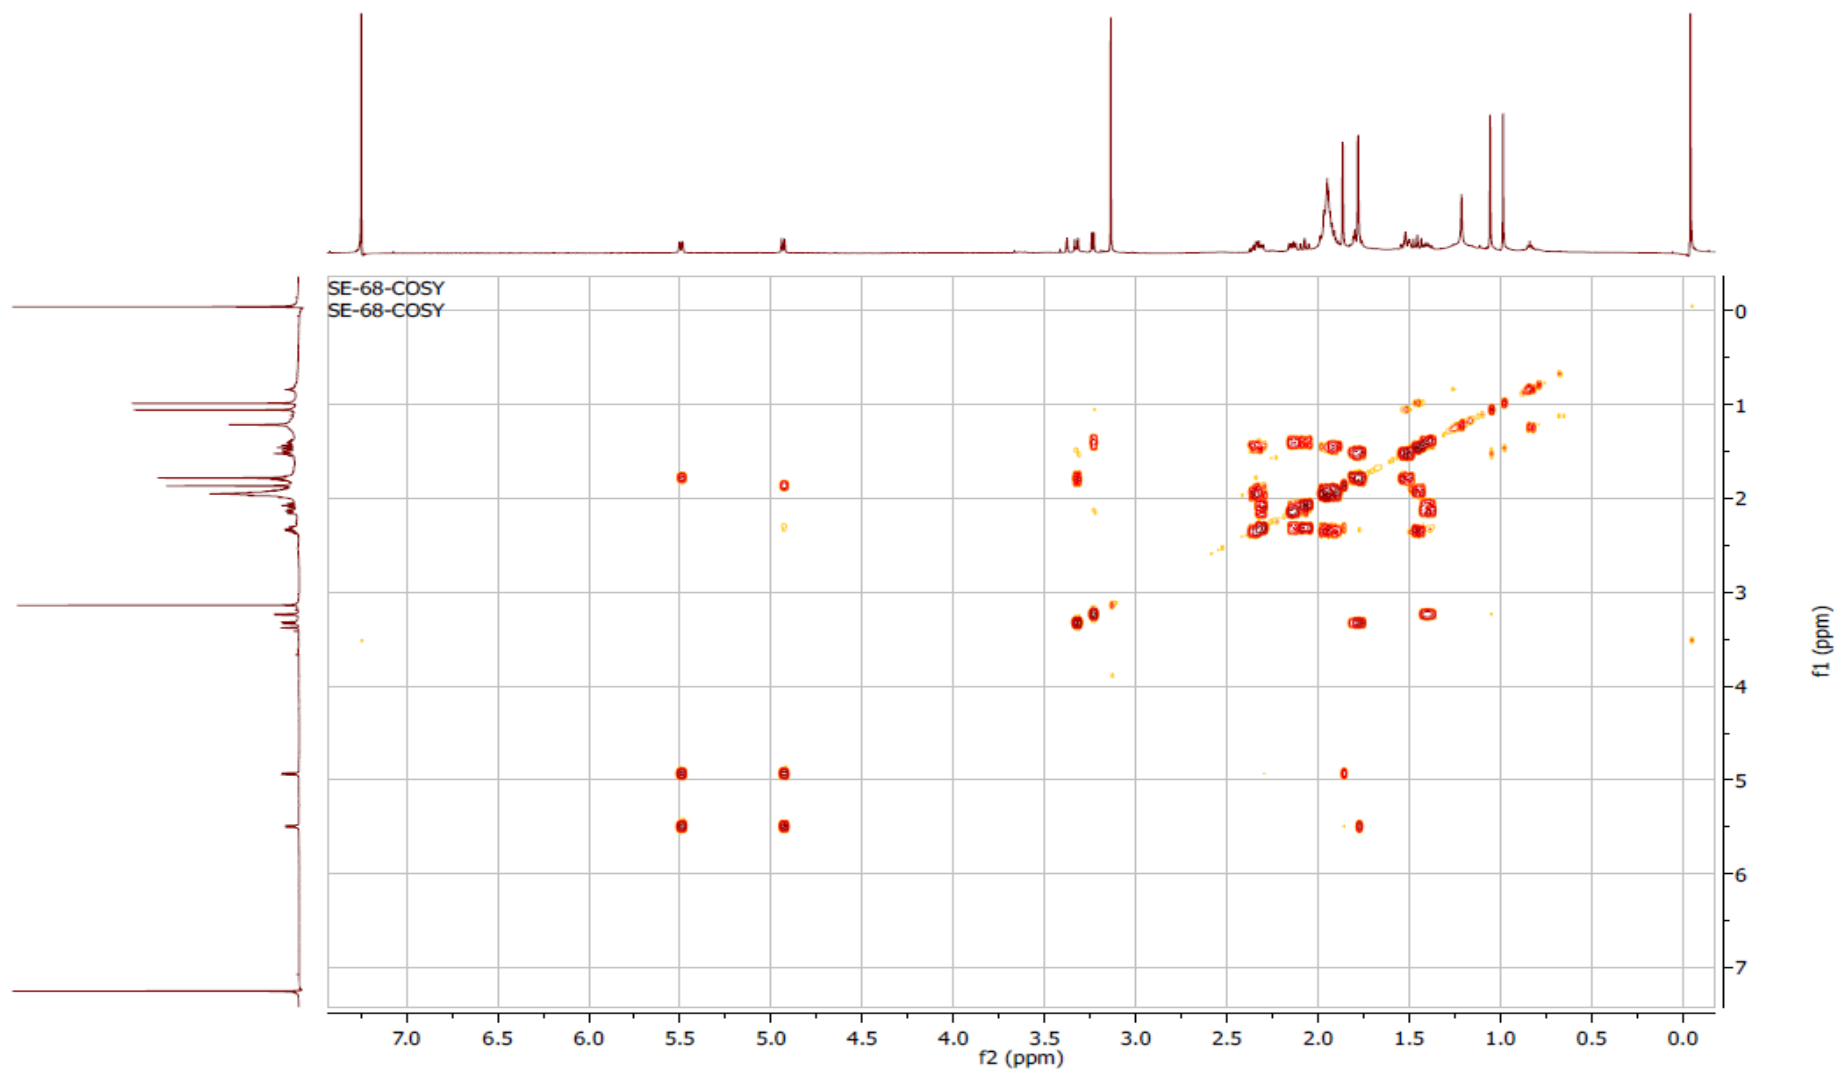

Figure S7. NOESY spectrum of Sarcoehrenbergilid A (1) in CDCl<sub>3</sub>.

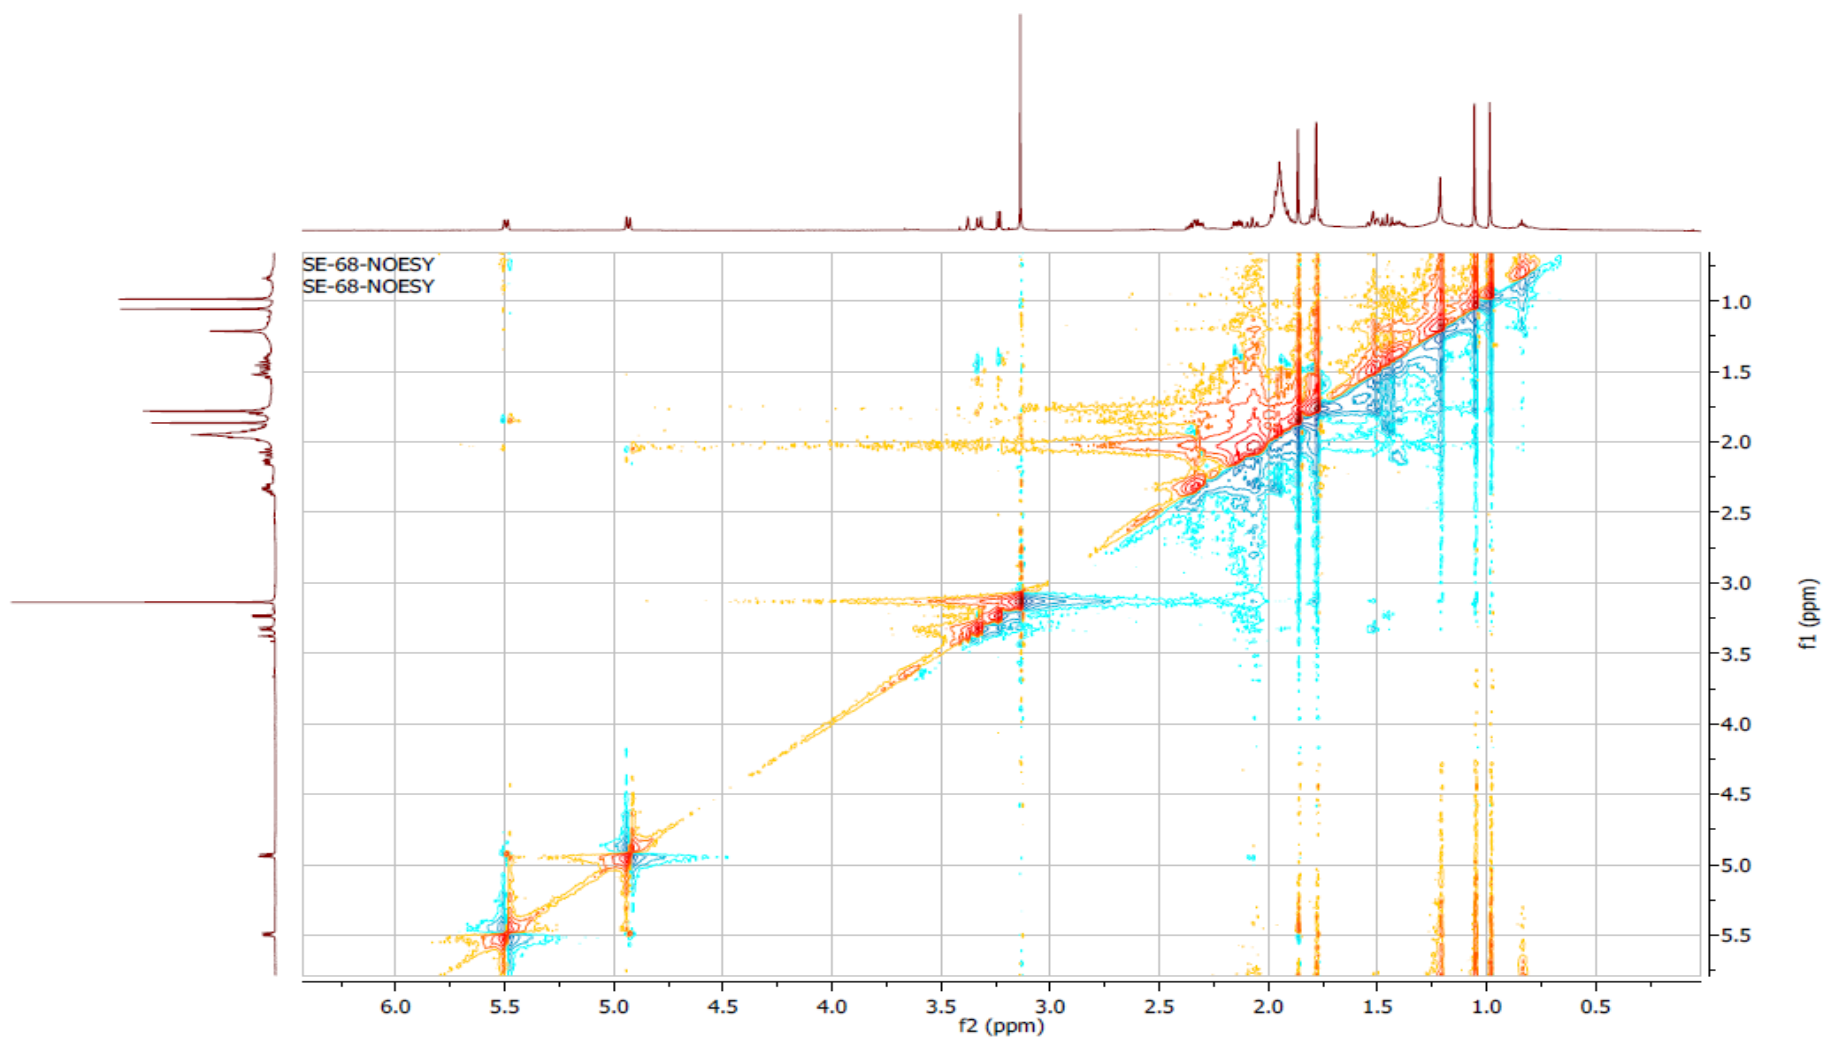

Figure S8. HR-ESI-FTMS spectrum of Sarcoehrenbergilid B (2).

SE-76

Mw 350

(+)HR-ESI-FTMS

141120\_01SE-76MS350 #13 RT: 0.17 AV: 1 NL: 4.28E6  
T: FTMS + p ESI Full ms [50.00-2000.00]

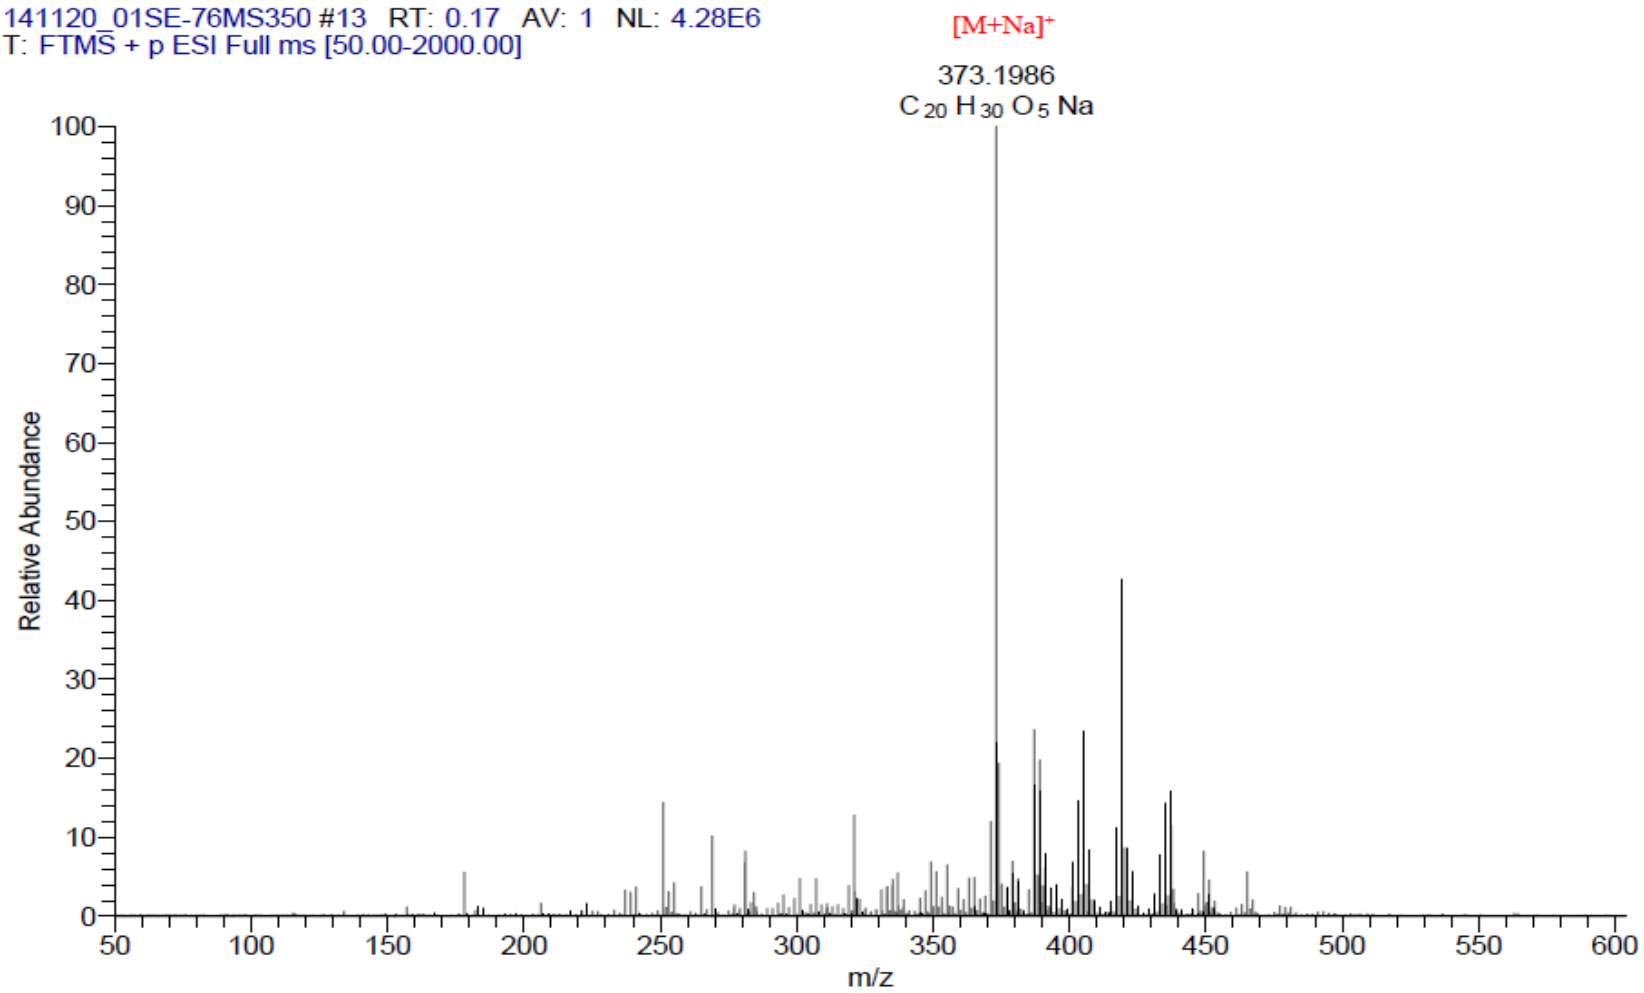

**Figure S9.**  $^1\text{H}$  NMR spectrum of Sarcoehrenbergilid B (**2**) in  $\text{CDCl}_3$ .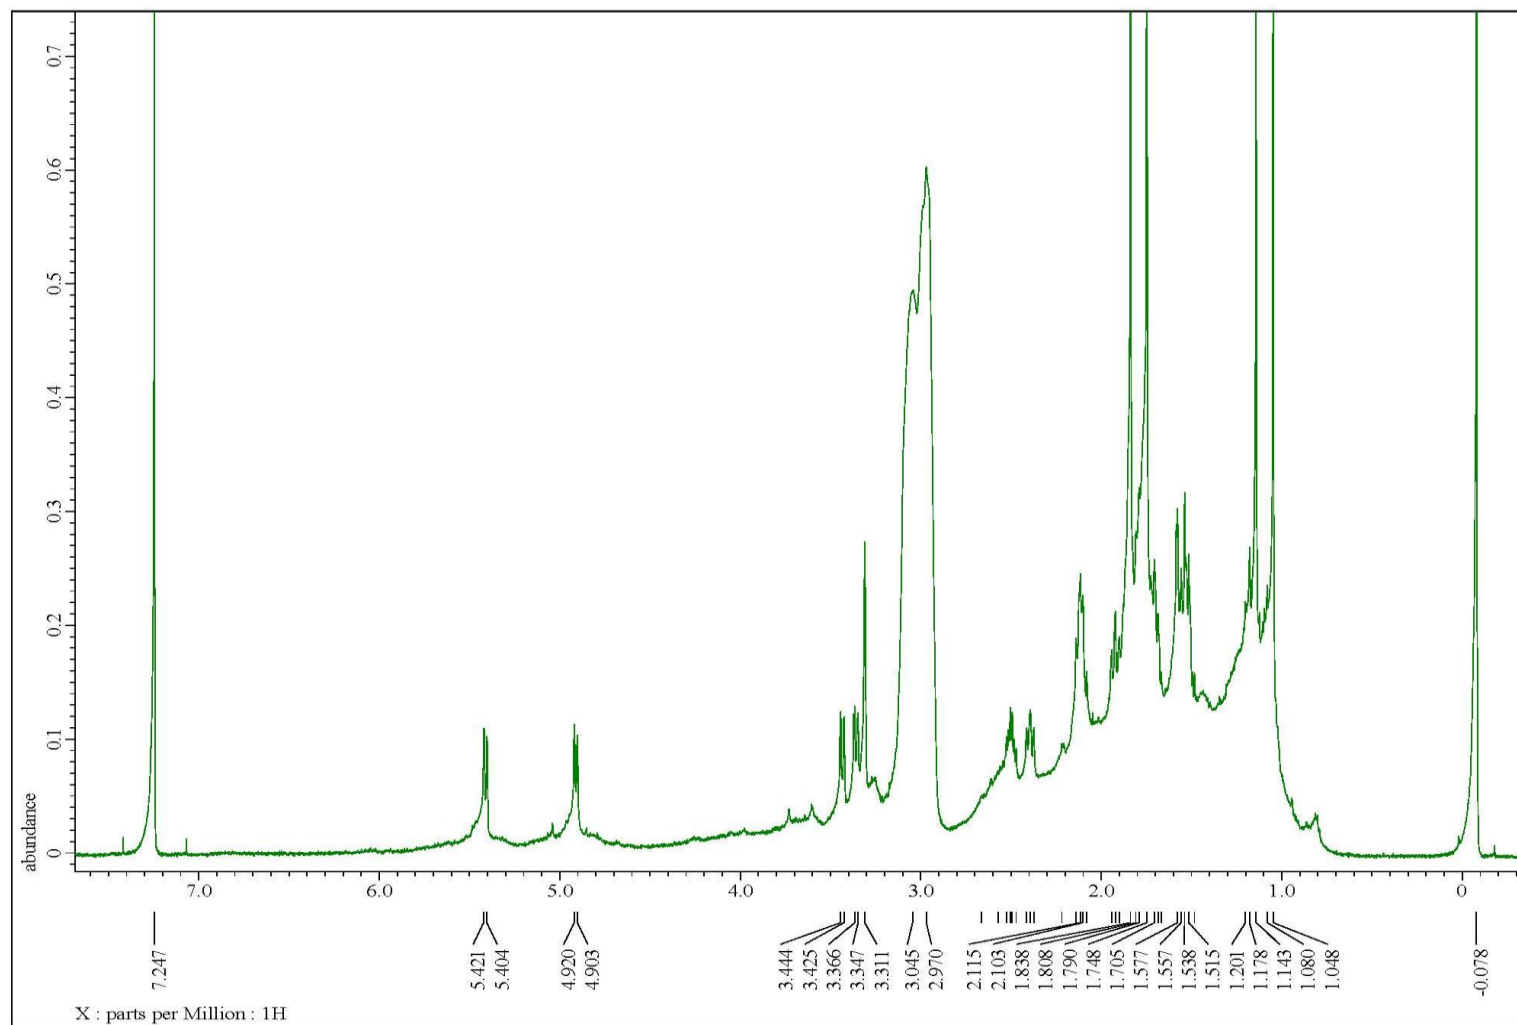

**Figure S10.**  $^{13}\text{C}$  NMR spectrum of Sarcoehrenbergilid B (**2**) in  $\text{CDCl}_3$ .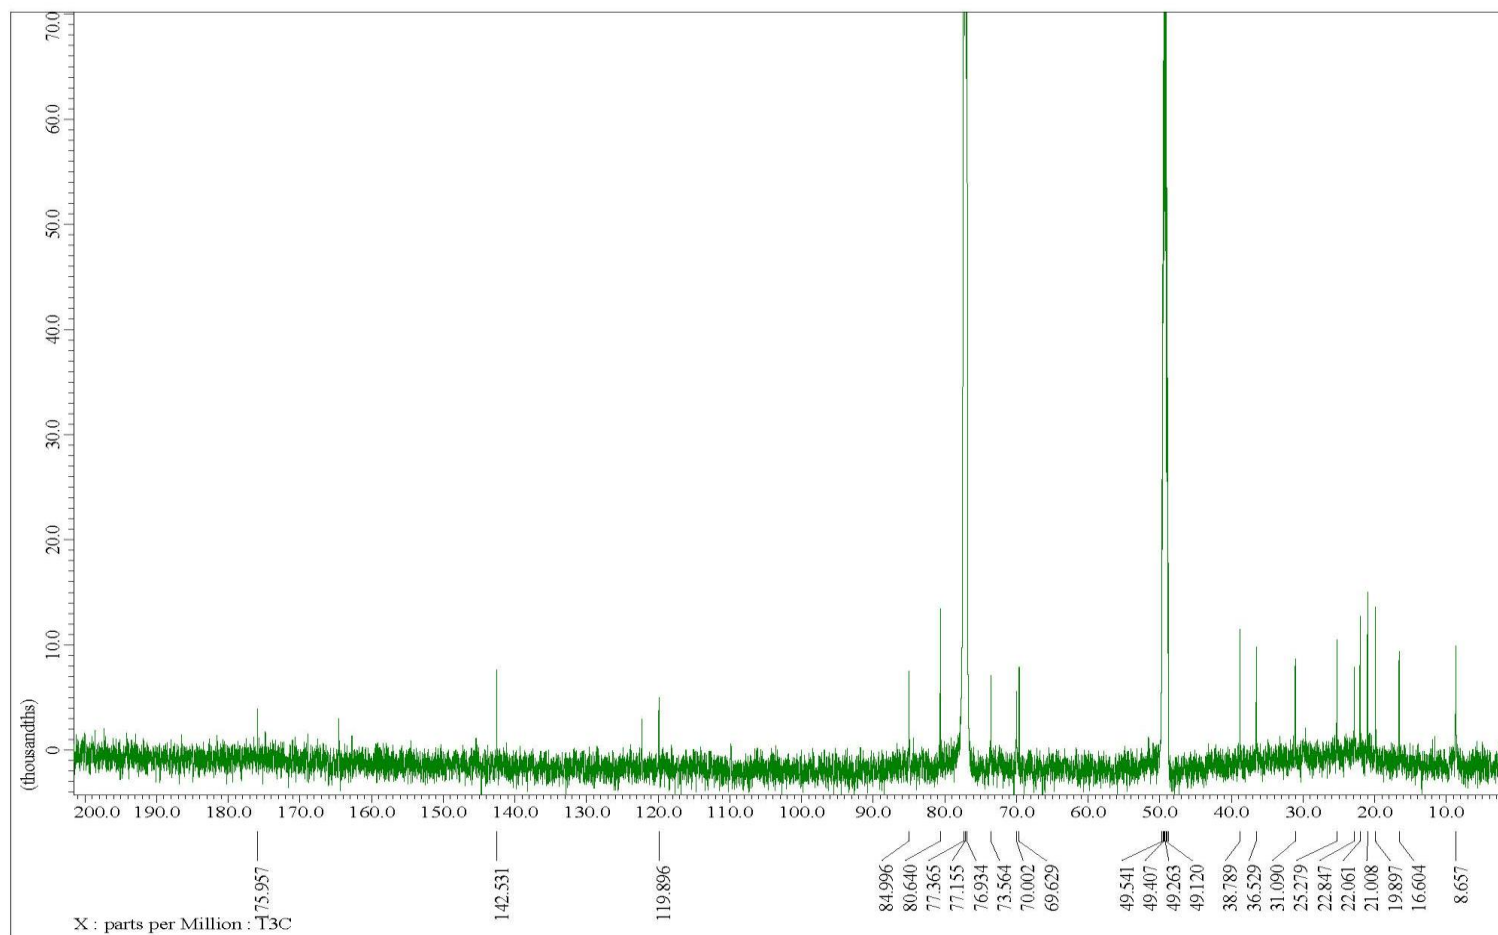

**Figure S11.**  $^1\text{H}$ - $^1\text{H}$  COSY spectrum of Sarcoehrenbergilid B (**2**) in  $\text{CDCl}_3$ .

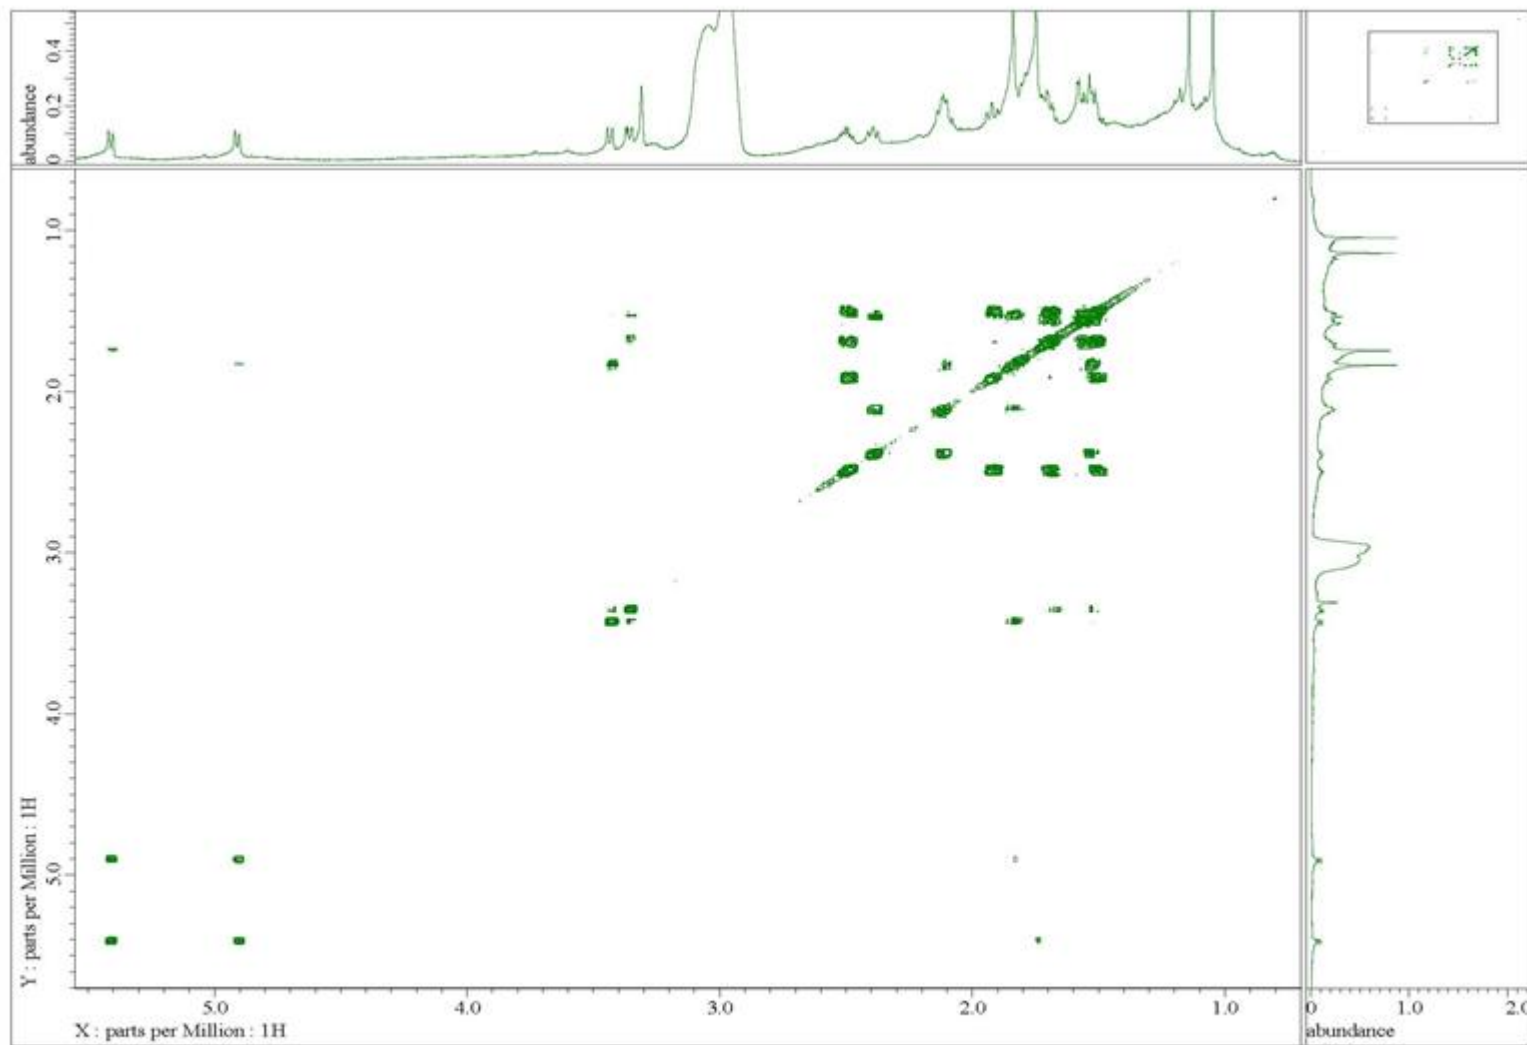

**Figure S12.** HSQC spectrum of Sarcoehrenbergilid B (2) in CDCl<sub>3</sub>.

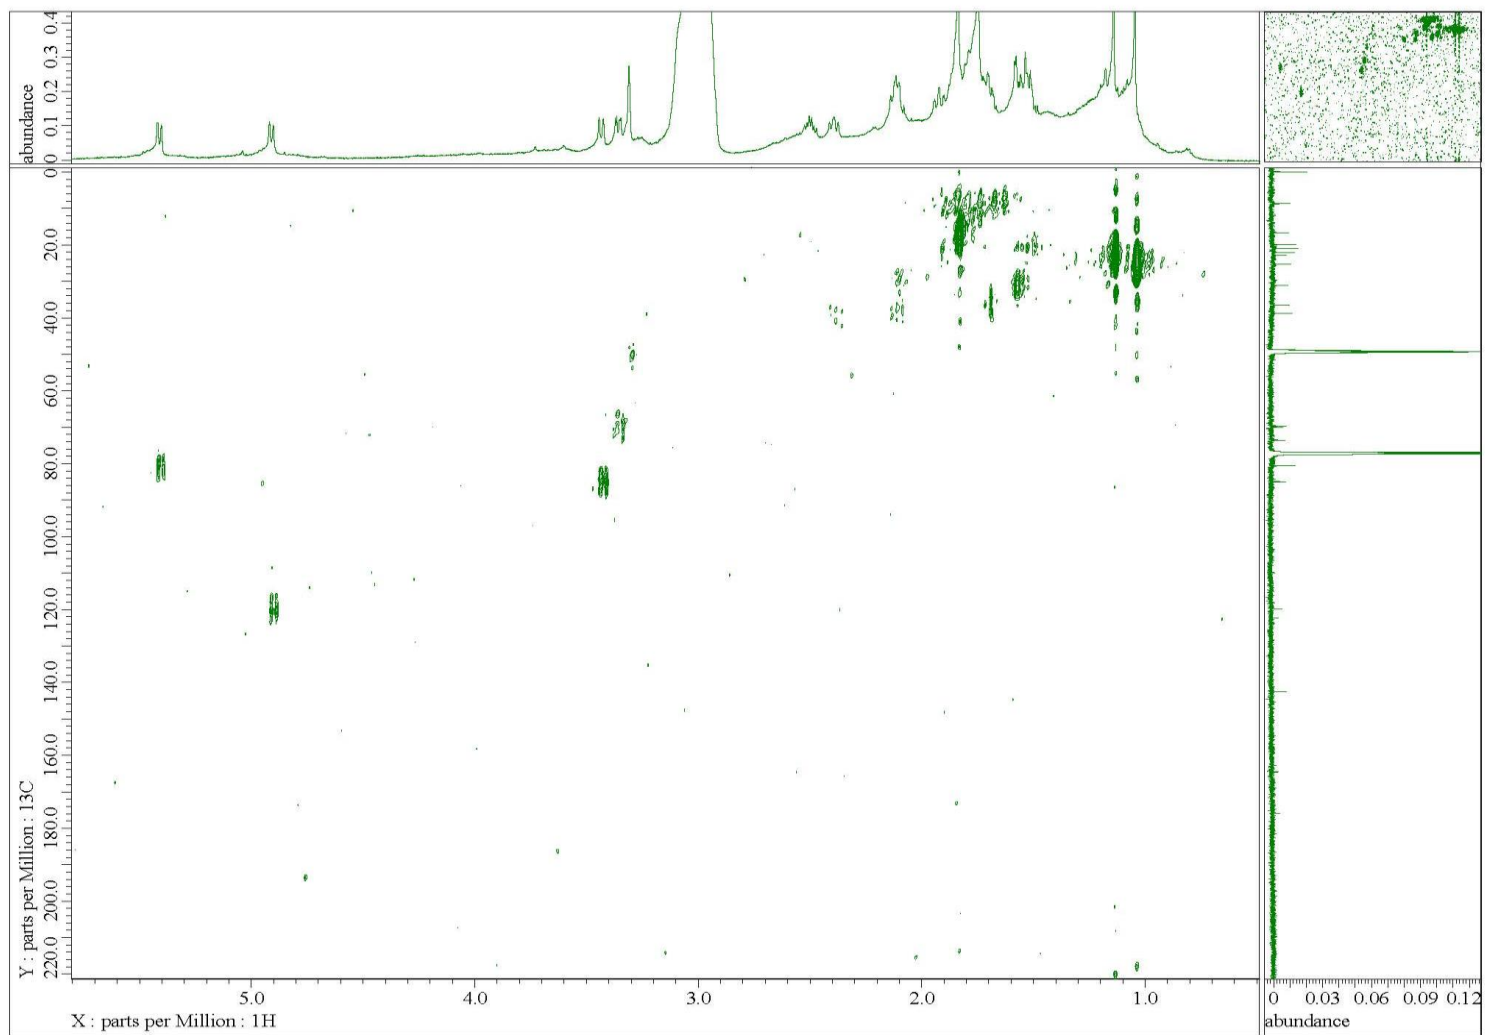



Figure S13. HMBC spectrum of Sarcoehrenbergilid B (2) in CDCl<sub>3</sub>.

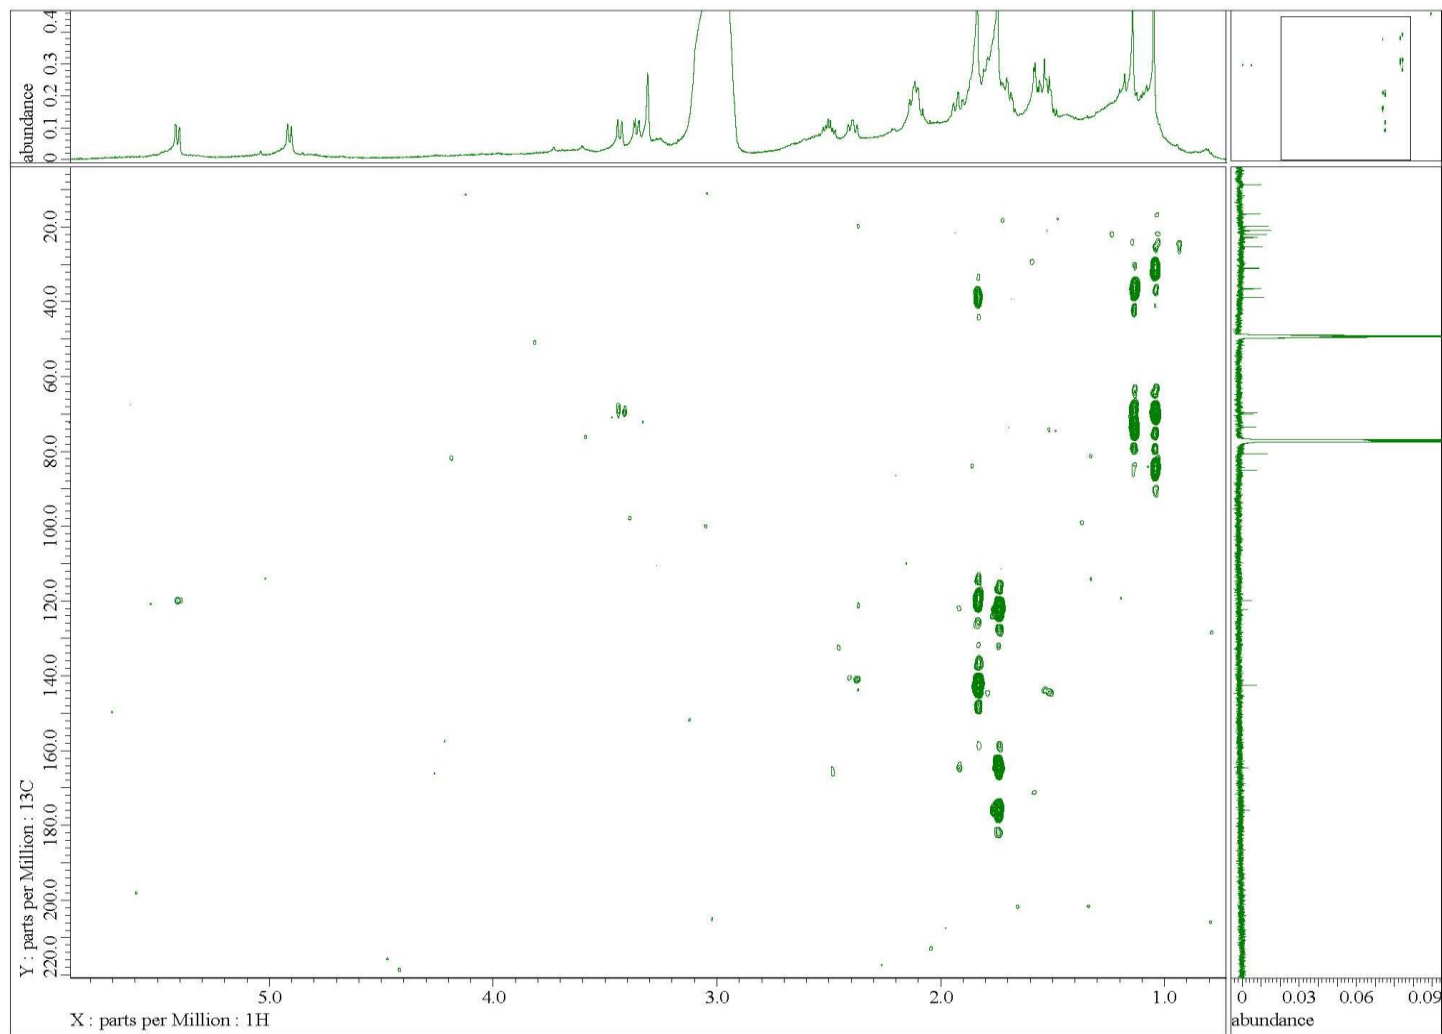

**Figure S14.** NOESY spectrum of Sarcoehrenbergilid B (2) in CDCl<sub>3</sub>.

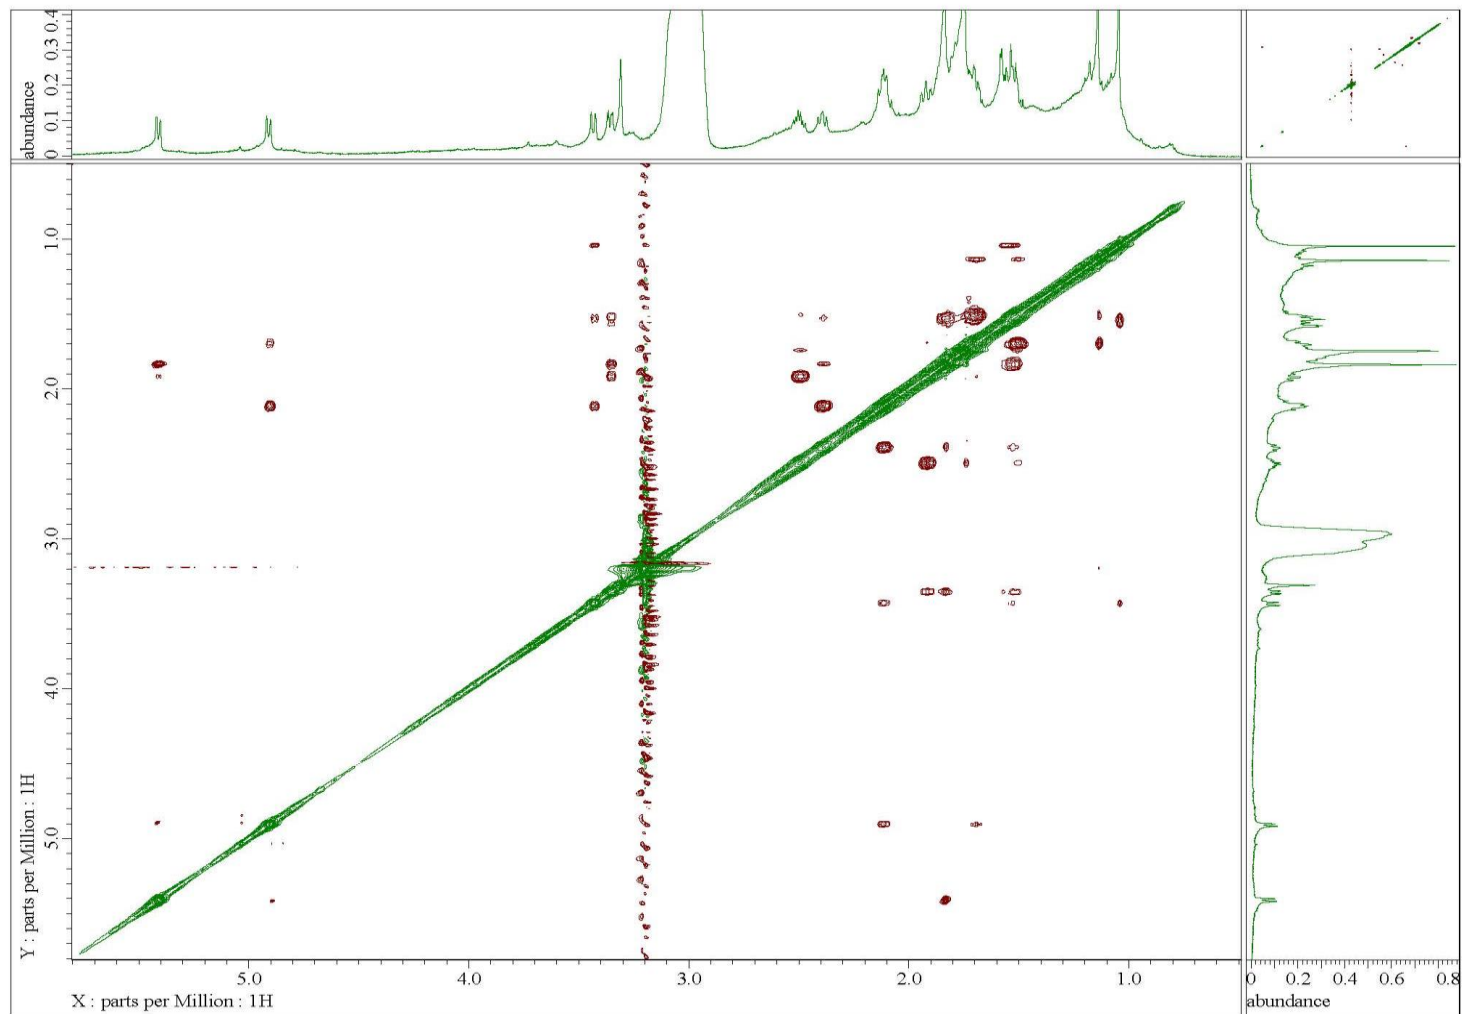

**Figure S15.** HR-ESI-FTMS spectrum of Sarcoehrenbergilid C (3).

SE-80

Mw 350

(+)HR-ESI-FTMS

141017\_12SE-80 #17 RT: 0.20 AV: 1 NL: 4.86E6  
T: FTMS + p ESI Full ms [50.00-2000.00]

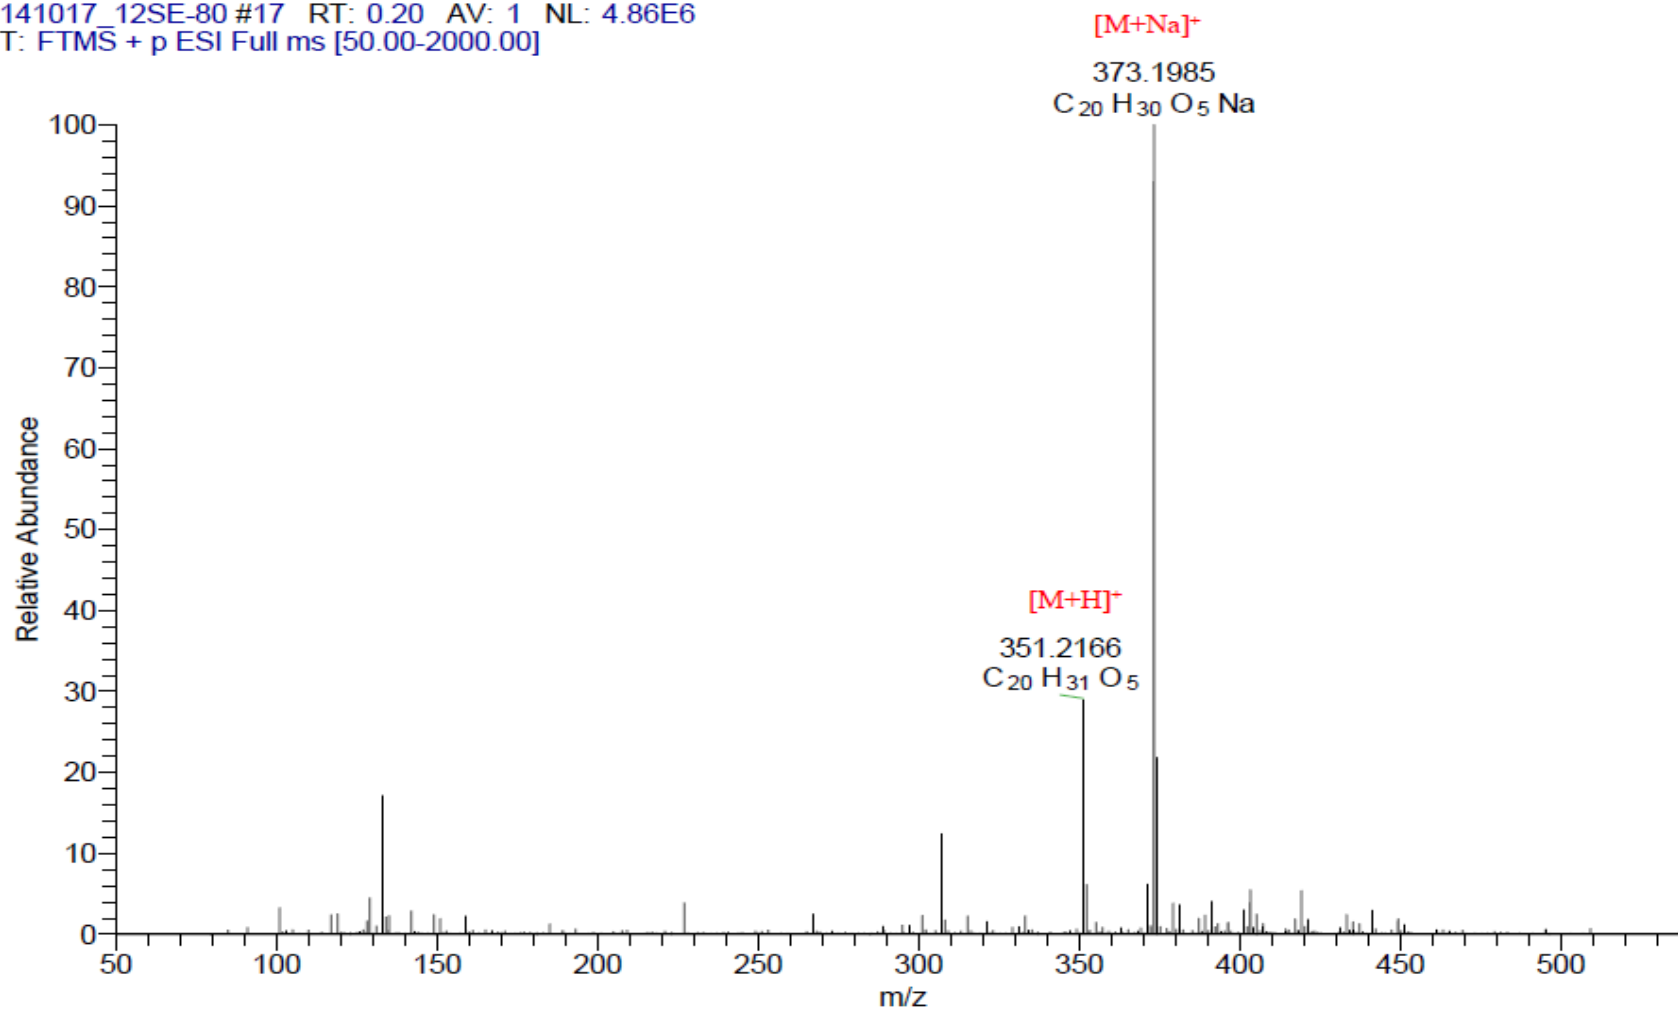

**Figure S16.**  $^1\text{H}$  NMR spectrum of Sarcoehrenbergilid C (**3**) in  $\text{CDCl}_3$ .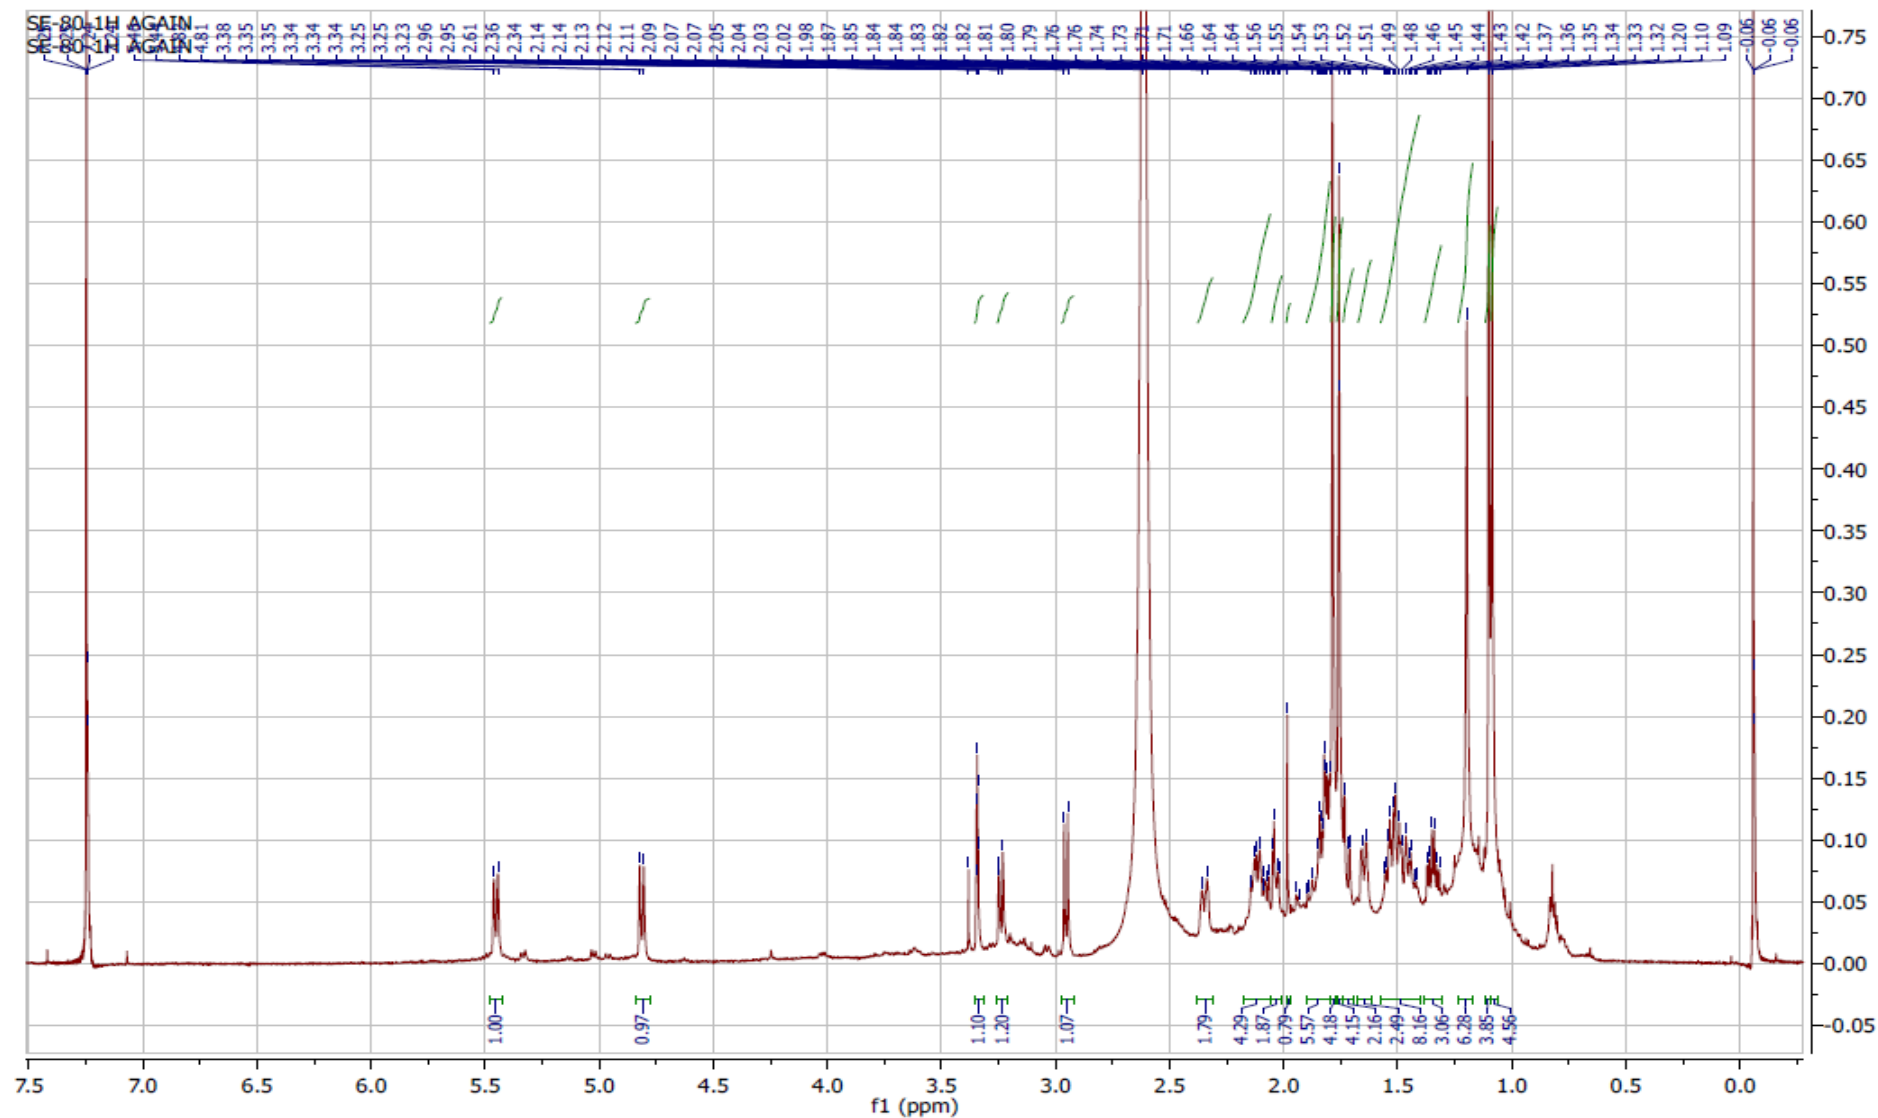

Figure S17.  $^{13}\text{C}$  NMR spectrum of Sarcoehrenbergilid C (3) in  $\text{CDCl}_3$ .

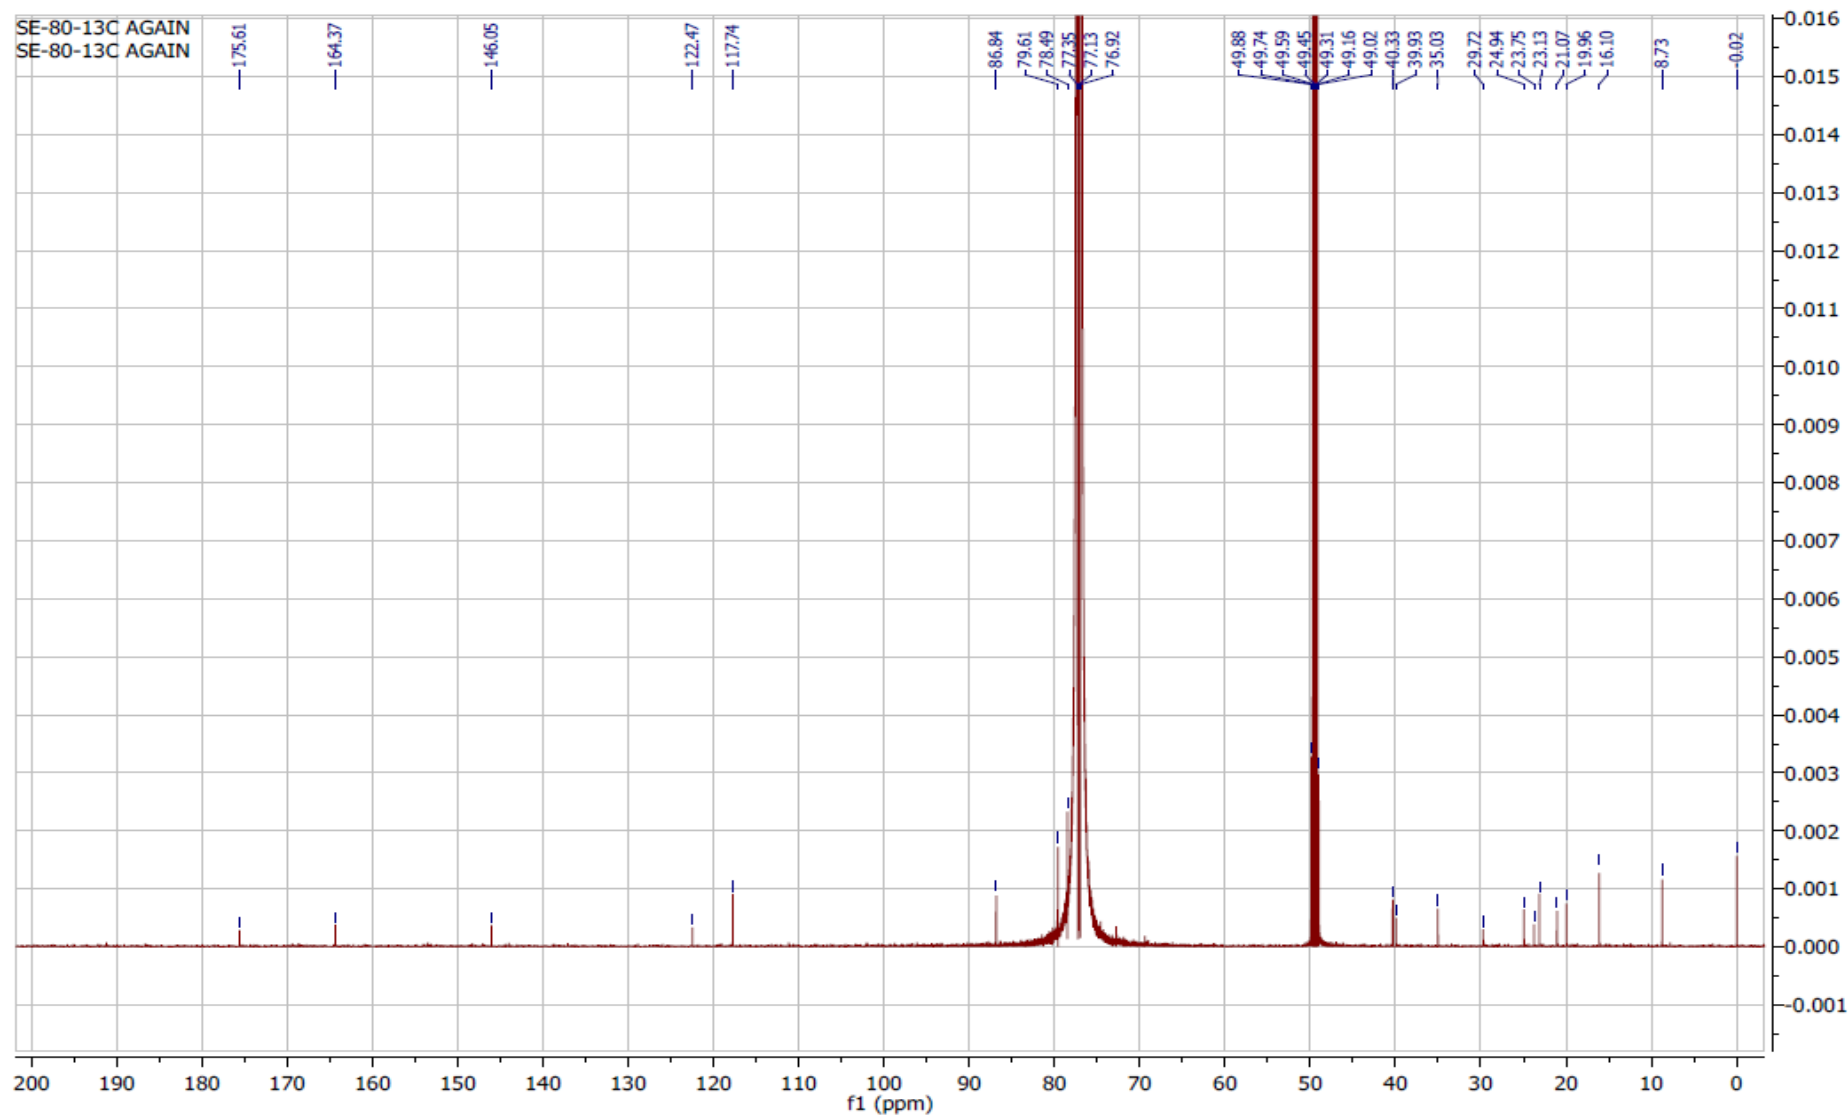

**Figure S18.** DEPT spectrum of Sarcoehrenbergilid C (**3**) in CDCl<sub>3</sub>.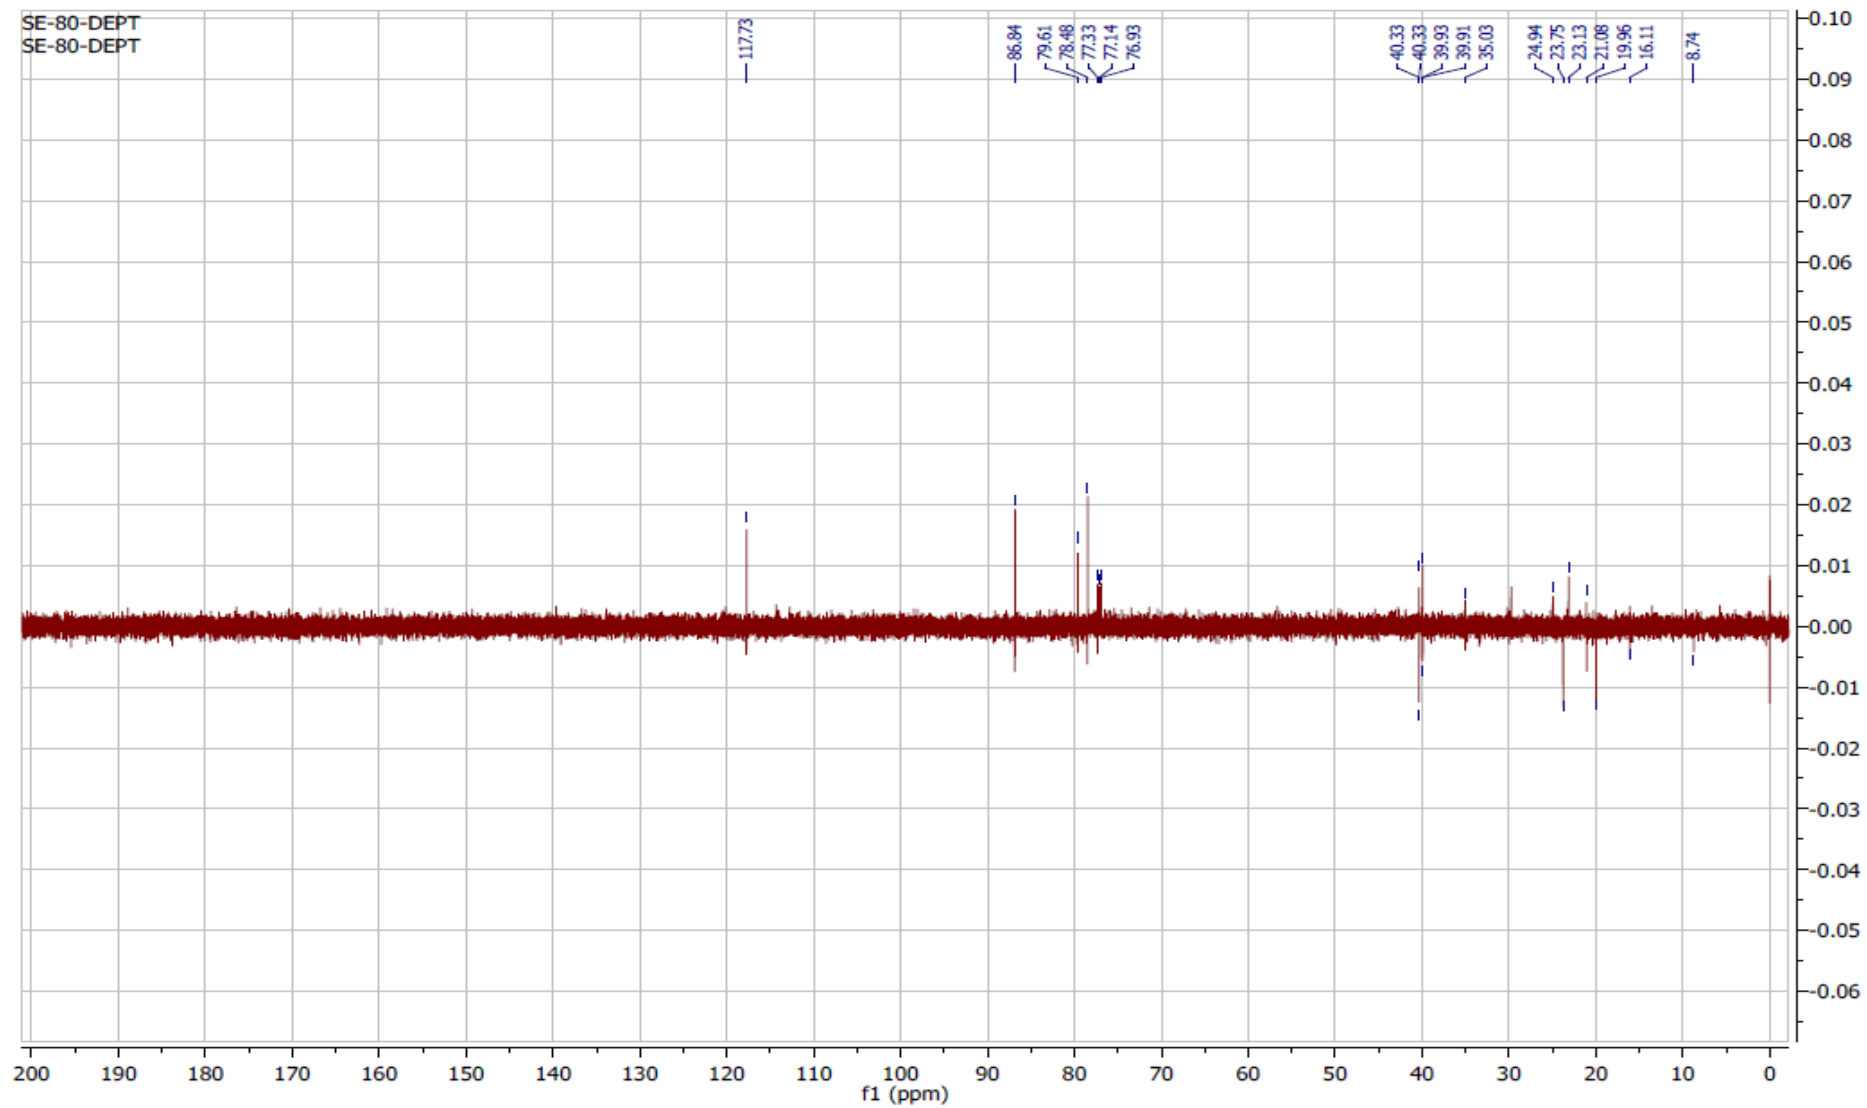

**Figure S19.** HSQC spectrum of Sarcoehrenbergilid C (**3**) in CDCl<sub>3</sub>.

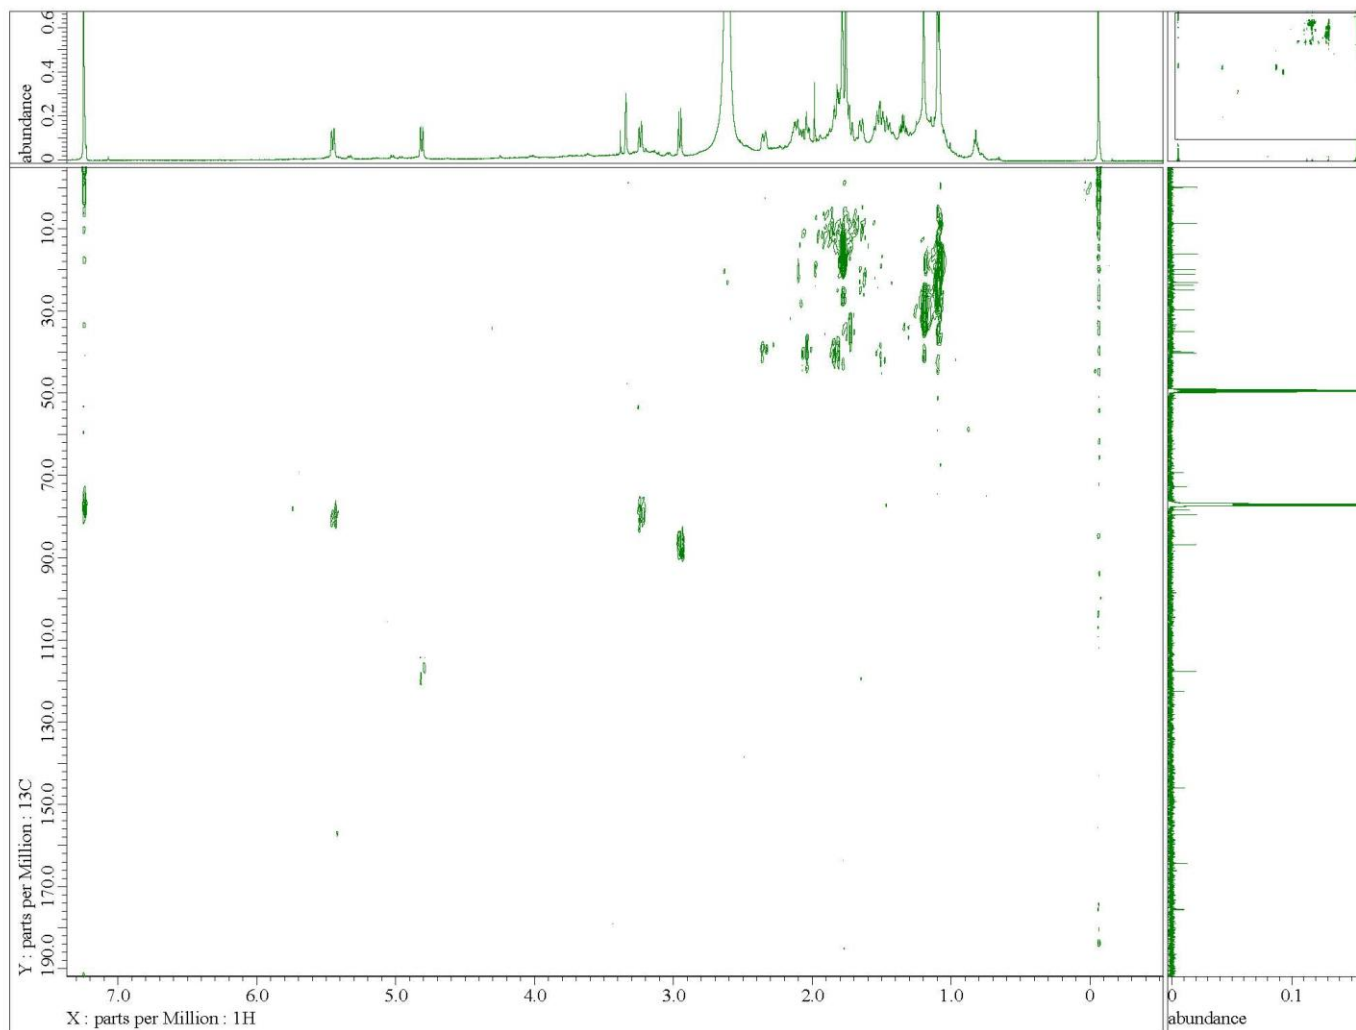

Figure S20. HMBC spectrum of Sarcoehrenbergilid C (3) in CDCl<sub>3</sub>.

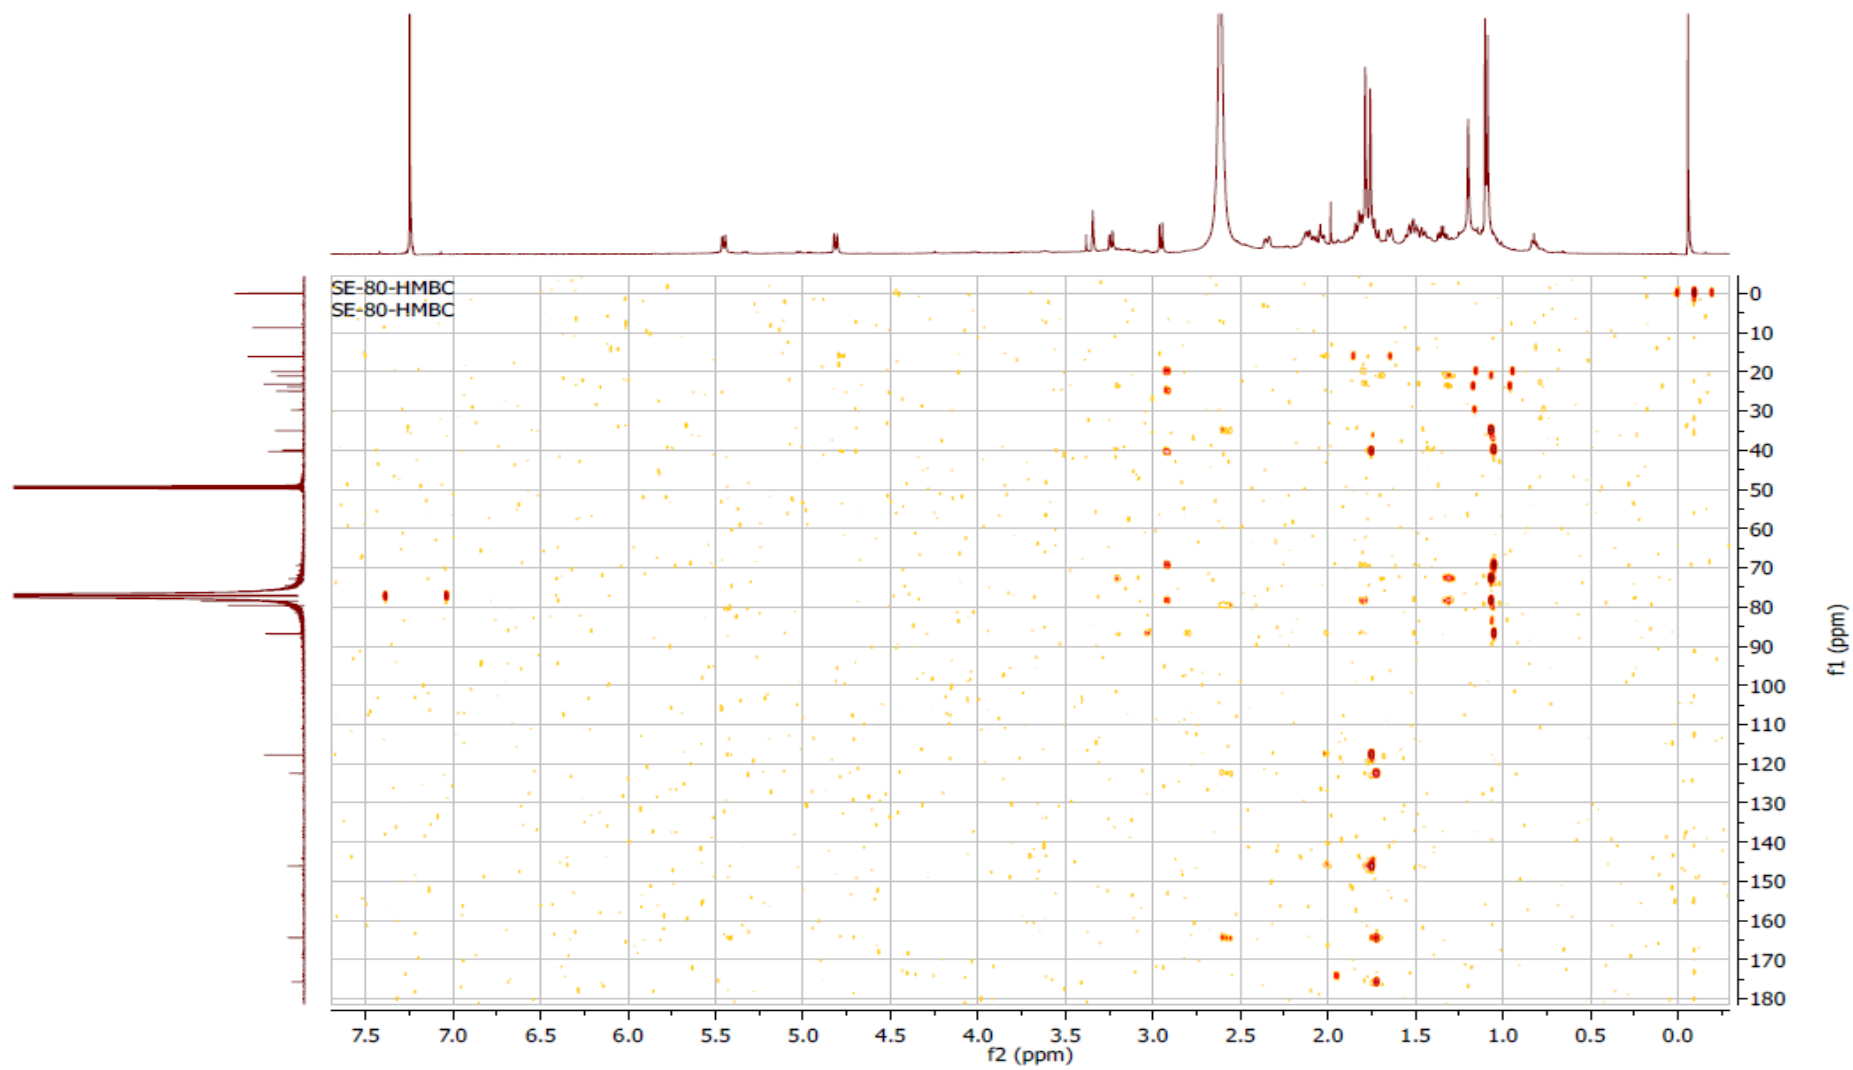



**Figure S21.** NOESY spectrum of Sarcoehrenbergilid C (**3**) in CDCl<sub>3</sub>.

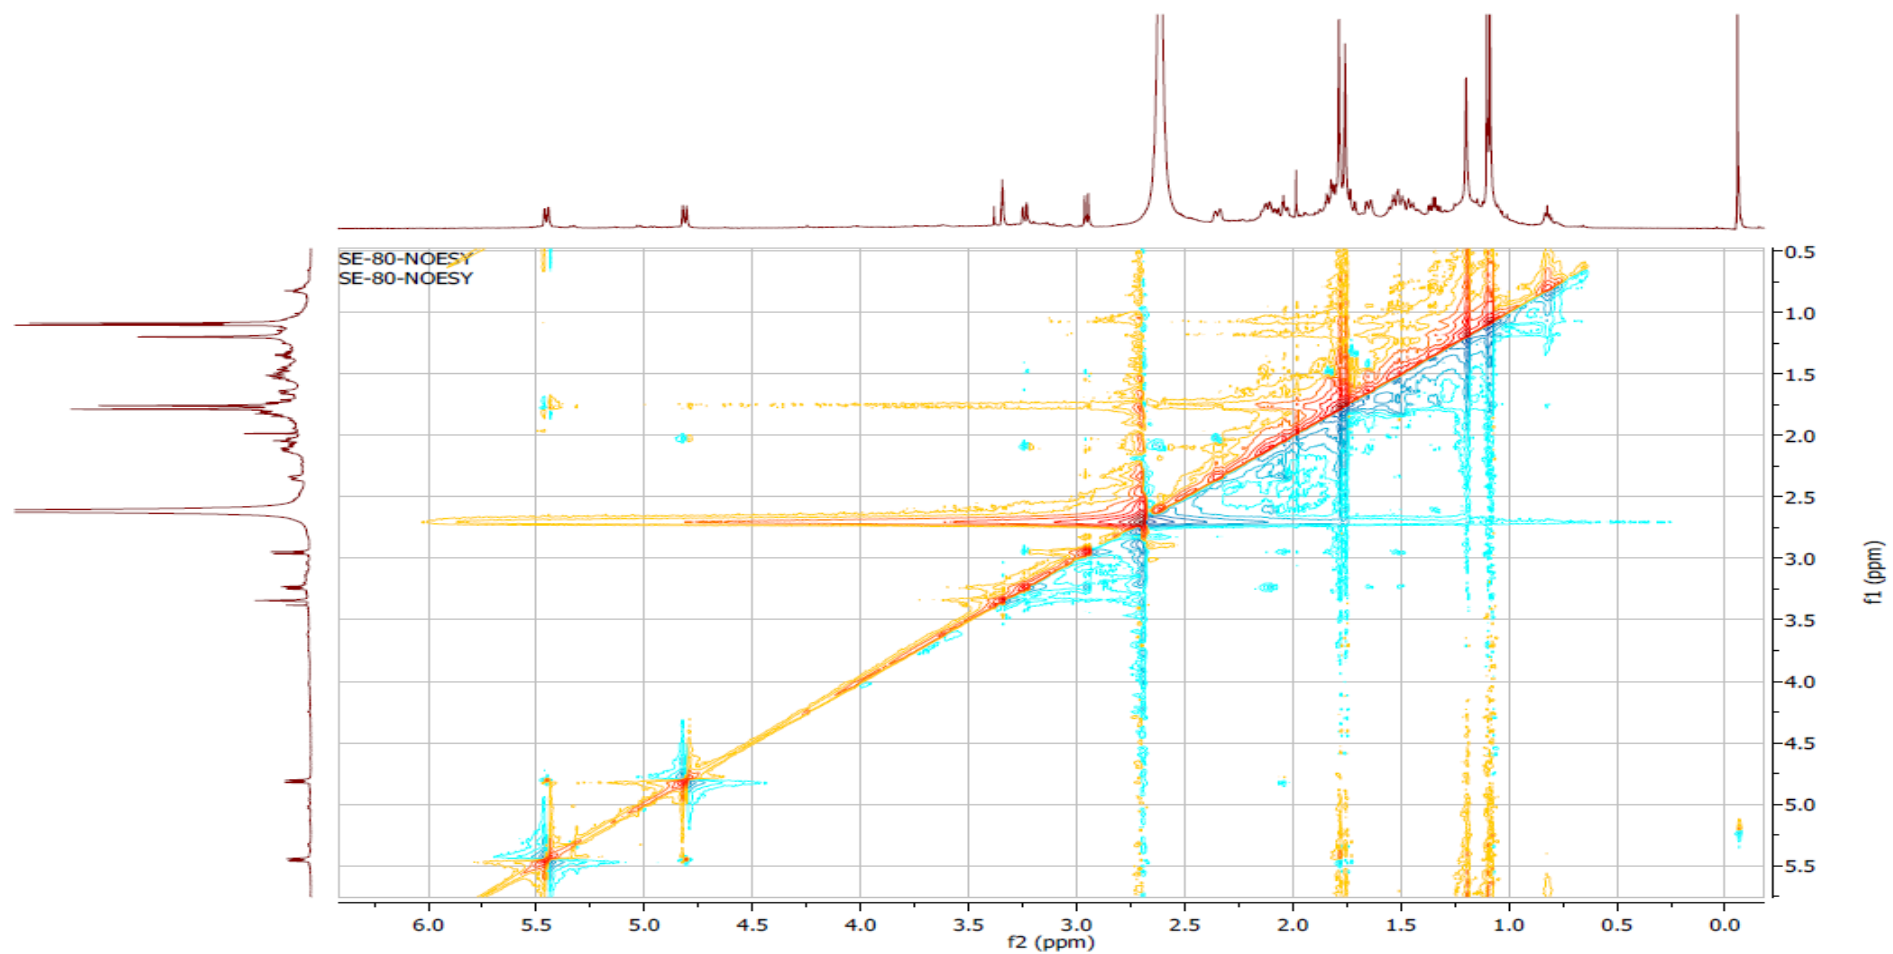

**Figure S22.** Optimized structure and relative free energy of conformers of **1** with Boltzmann population higher than 1%.

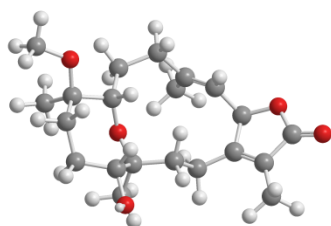

**Compound 1a**

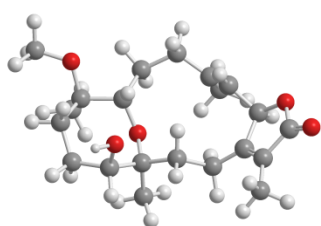

**conformer 1b**  
 $\Delta G=+2.8$  kJ/mol

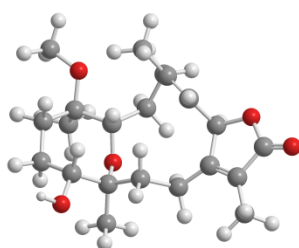

**conformer 1c**  
 $\Delta G=+3.1$  kJ/mol

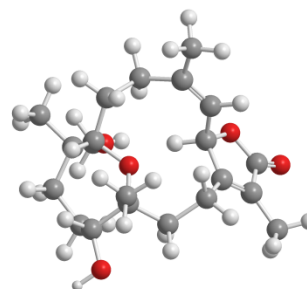

**conformer 1d**  
 $\Delta G=+3.2$  kJ/mol

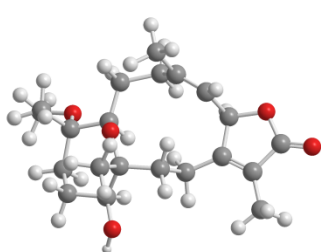

**conformer 1e**  
 $\Delta G=+4.2$  kJ/mol

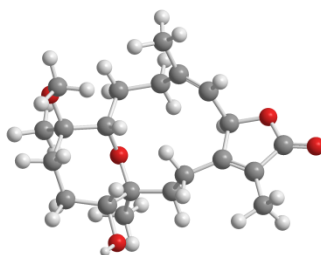

**conformer 1f**  
 $\Delta G=+4.3$  kJ/mol

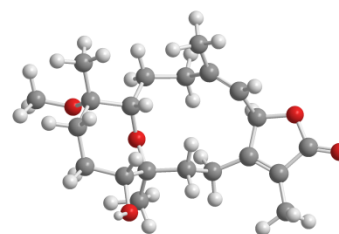

**conformer 1g**  
 $\Delta G=+5.3$  kJ/mol

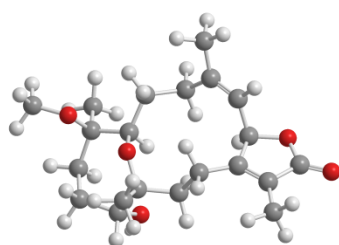

**conformer 1h**  
 $\Delta G=+7.0$  kJ/mol

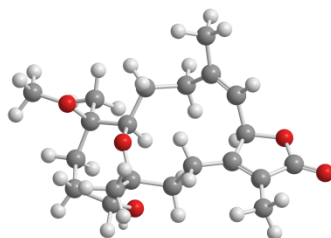

**conformer 1i**  
 $\Delta G=+7.4$  kJ/mol

**Figure S23.** Optimized structure and relative free energy of conformers of **2** with Boltzmann population higher than 1%.

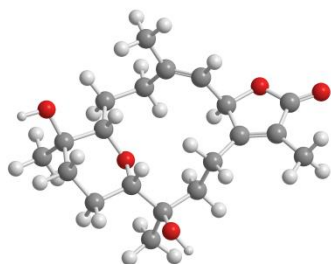

**Compound 2a**

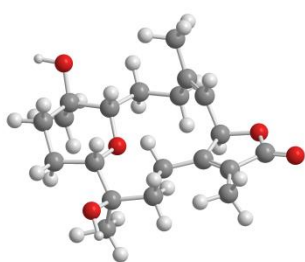

**conformer 2b**  
 $\Delta G=+0.2$  kJ/mol

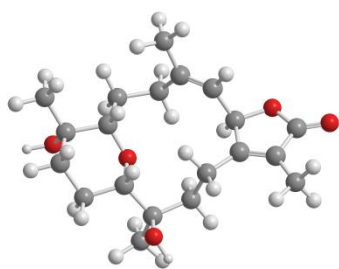

**conformer 2c**  
 $\Delta G=+1.5$  kJ/mol

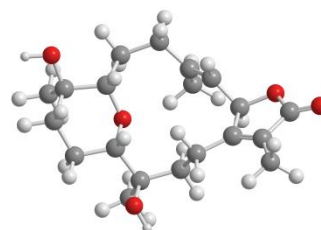

**conformer 2d**  
 $\Delta G=+4.4$  kJ/mol

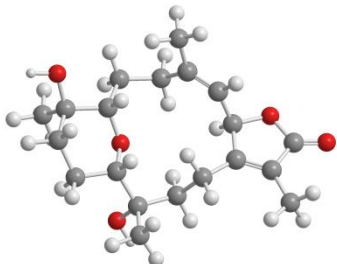

**conformer 2e**  
 $\Delta G=+6.6$  kJ/mol

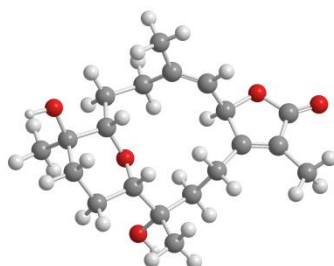

**conformer 2f**  
 $\Delta G=+6.8$  kJ/mol

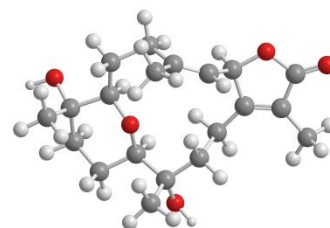

**conformer 2g**  
 $\Delta G=+7.4$  kJ/mol

**Figure S24.** Optimized structure and relative free energy of conformers of **3** with Boltzmann population higher than 1%.

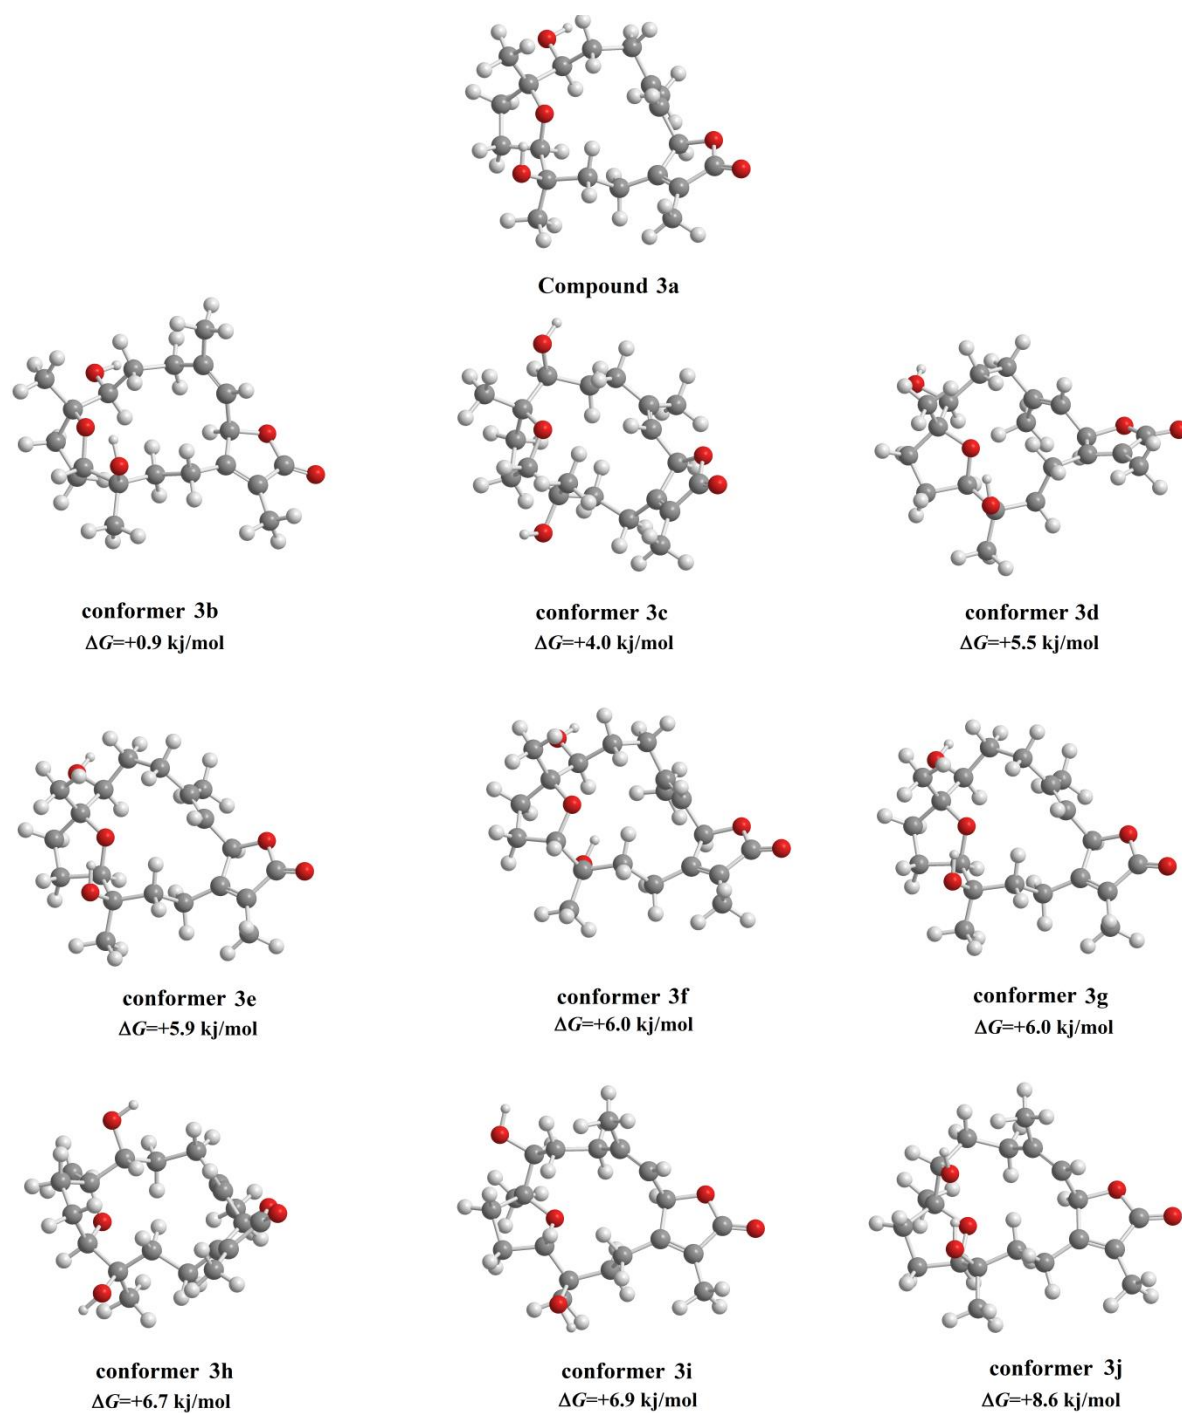

**Figure S25.** Anti-proliferative A549 response curves with 1-8 based on MTT-reduction assay.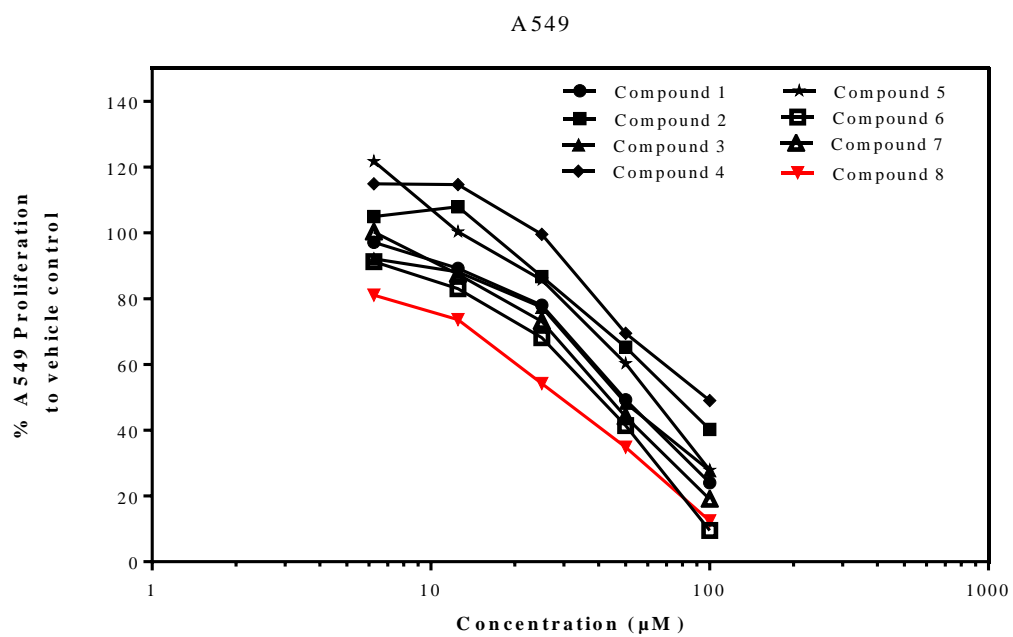

**Figure S26.** Anti-proliferative Caco-2 response curves with 1-8 based on MTT-reduction assay.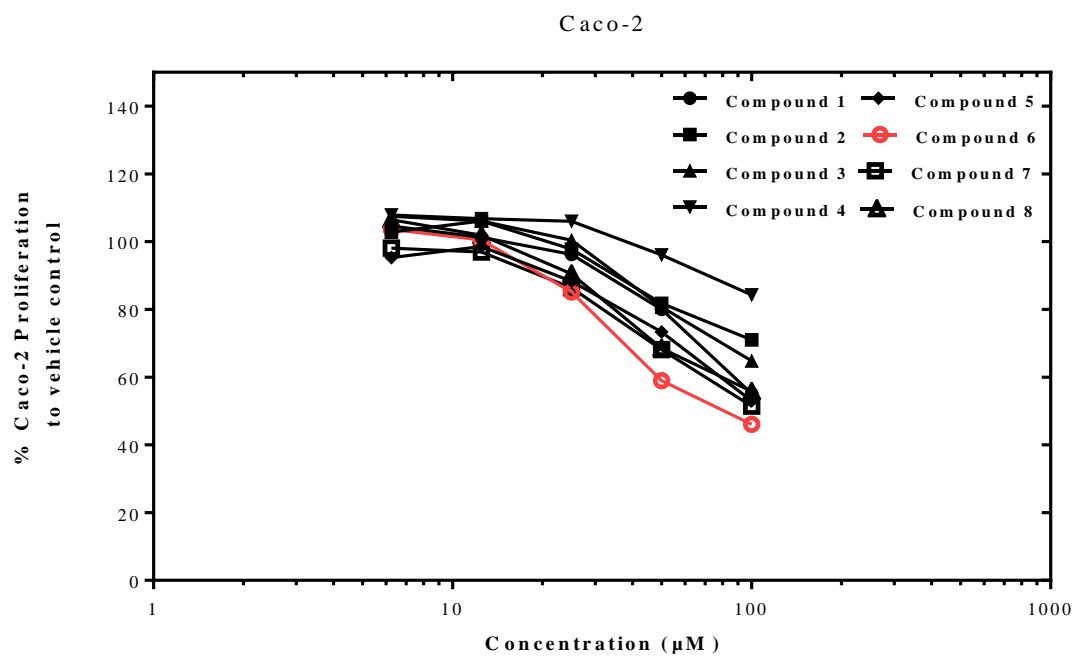

**Figure S27.** Anti-proliferative HepG2 response curves with 1-8 based on MTT-reduction assay.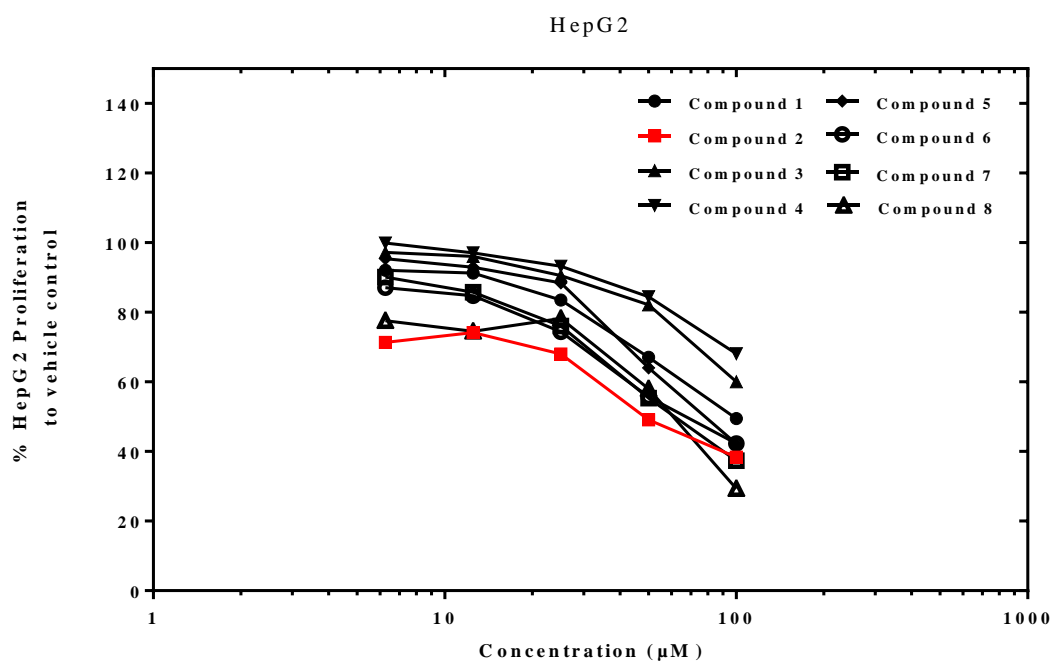

**Figure S28.** Calculated (i) Autodock and (ii) MM/GBSA binding energies of compounds with EGFR kinase domain relative to the experimental binding energies for the tested compounds against A549 cell line.

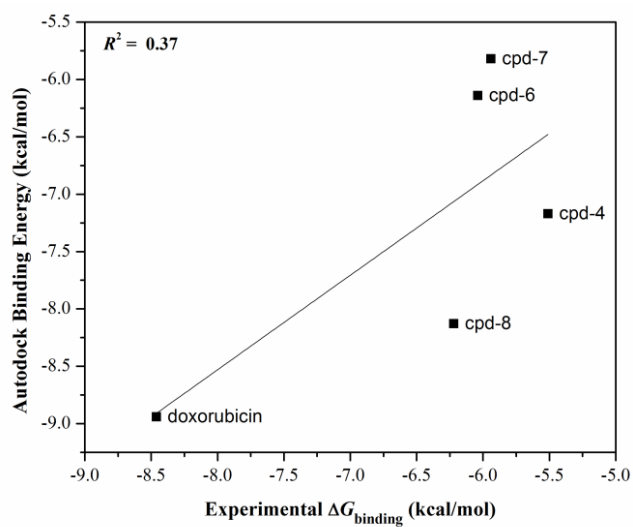

(i)

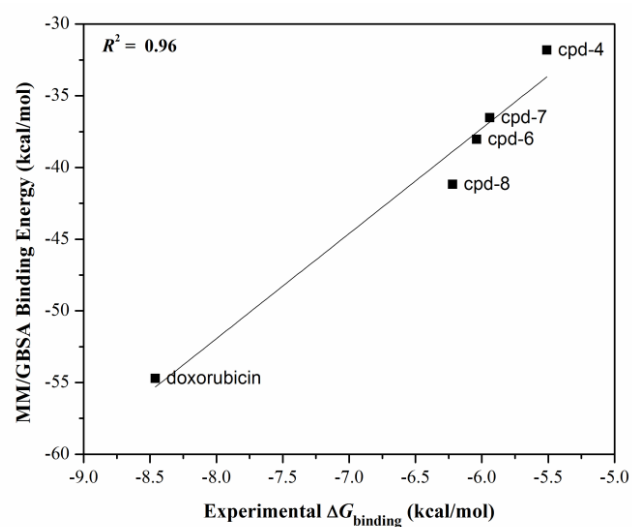

(ii)



**Figure S29.** Hydrogen bond distance between **8** and carboxylate oxygen atom of Asp<sup>776</sup> inside EGFR active site over a 2.5 ns simulation time.

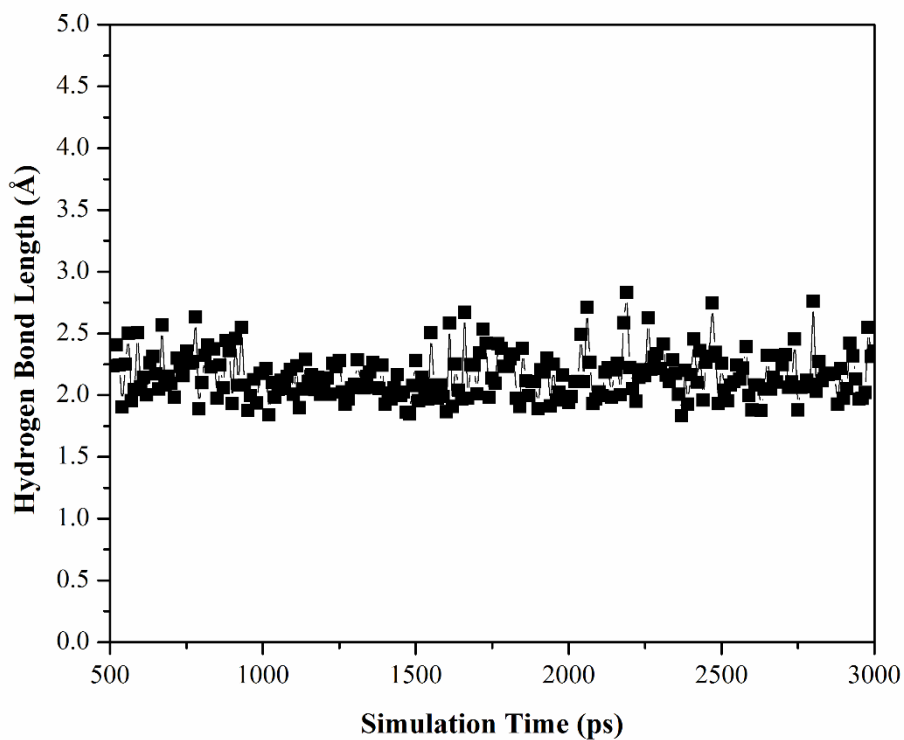

© 2017 by the authors; licensee MDPI, Basel, Switzerland. This article is an open access article distributed under the terms and conditions of the Creative Commons Attribution license (<http://creativecommons.org/licenses/by/3.0/>).
